# Supplementary material for: A multiplexed targeted mass spectrometric assay for quantifying obesity- associated biomarkers in human plasma
Source: Research Square preprint supplement (doi:10.21203/rs.3.rs-9588456/v1), 2026-05-20
Supplement: Supplementary file 1 [file 69c634bc66dfbcceb44a1ca7.docx]

**Table 1.** Obesity biomarkers and the assay validation of 42 surrogate peptides.
