# Supplementary material for: A multiplexed targeted mass spectrometric assay for quantifying obesity- associated biomarkers in human plasma
Source: Research Square preprint supplement (doi:10.21203/rs.3.rs-9588456/v1), 2026-05-20
Supplement: Supplementary file 2 [file 94b29145d2f30ea372875ecd.xlsx]

## Sheet: Contents
Tables	Description
Supplemental Table 1	Candidate list and surrogate peptides for each candidate (related to Supplemental Fig. S1)
Supplemental Table 2	The list of detetable proteins in non-depletion plasma (related to Surrogate Peptides and Transitions Selection)
Supplemental Table 3	List of peptides with good linearity and reproducibility across three LC gradients (related to LC Gradient optimization)
Supplemental Table 4	Repeatibility test of 95 surrogated peptides
Supplemental Table 5	Imprecision test of 95 surrogated peptides
Supplemental Table 6	Pre-extraction and postextraction stability assessment of surogate peptides
Supplemental Table 7	Reproducibility test of 96-well plate sample preparation
Supplemental Table 8	The ratios of 42 biomarker candidates from the cross-laboratory multiplex assay validation (related to Fig. 4)
Supplemental Table 9	The clinical information of Cross-sectional samples
Supplemental Table 10	The clinical information of longitudinal samples samples

## Sheet: Supply_Table 1
Supplemental Table 1. Candidate list and surrogate peptides for each candidate
Gene symbol	preceding_residue	peptide_sequence	following residue	length	PSM of plasma database*	PSM of Serum PeptideAtlas	PPA score$	CONS score#
APOB	R	GIISALLVPPETEEAK	Q	16	2885	5167	0.74	0.846
	K	SVSDGIAALDLNAVANK	I	17	2249	5231	0.79	0.777		* According to the published plasma databases from Mann et al., Lehtio et al., and our own data
	K	LLSGGNTLHLVSTTK	T	15	2089	5397	0.73	0.691		$ Peptide Prediction with Abundance
	K	SPAFTDLHLR	Y	10	1923	5156	0.79	0.676		# CONSeQuence
	R	ILGEELGFASLHDLQLLGK	L	19	1760	5748	0.54	0.546
	K	SVSLPSLDPASAK	I	13	1871	N/A	0.78	0.621
	K	GFEPTLEALFGK	Q	12	2393	N/A	0.72	0.681
ACE	K	IAFLPFGYLVDQWR	W	14	67	273	0.55	0.496
	R	AALPAQELEEYNK	I	13	64	266	0.79	0.601
	R	TQGDFDPGAK	F	10	59	37	0.35	0.277
	K	IAFIPFSYLVDQWR	W	14	58	161	0.53	0.482
	R	AILQFYPK	Y	8	38	103	0.75	0.326
	K	YVELINQAAR	L	10	37	143	0.8	0.511
	R	LNGYVDAGDSWR	S	12	31	15	0.77	0.586
ADIPOQ	K	IFYNQQNHYDGSTGK	F	15	1321	3575	0.76	0.606
	K	GDIGETGVPGAEGPR	G	15	180	1302	0.81	0.792
	R	SAFSVGLETYVTIPNMPIR	F	19	383	2860	0.61	0.75
	K	GDPGLIGPK	G	9	12	65	0.6	0.279
	K	FHCNIPGLYYFAYHITVYMK	D	20	12	115	0.25	0.32
	K	GEPGEGAYVYR	S	11	N/A	N/A	0.78	0.488
AGT	R	SLDFTELDVAAEK	I	13	2885	16320	0.74	0.677
	K	ALQDQLVLVAAK	L	12	2567	36688	0.77	0.571
	K	DPTFIPAPIQAK	T	12	1245	7827	0.79	0.649
	K	VLSALQAVQGLLVAQGR	A	17	1122	26509	0.74	0.531
	R	LQAILGVPWK	D	10	869	3838	0.74	0.461
APOE	R	LQAEAFQAR	L	9	962	12114	0.77	0.335
	R	LGPLVEQGR	V	9	834	19864	0.79	0.461
	R	LAVYQAGAR	E	9	933	10156	0.77	0.348
	R	QQTEWQSGQR	W	10	949	3460	0.49	0.283
CD14	R	ATVNPSAPR	C	9	330	3116	0.59	0.342
	K	FPAIQNLALR	N	10	283	3999	0.8	0.583
	R	SWLAELQQWLKPGLK	V	15	232	2835	0.51	0.231
	R	LTVGAAQVPAQLLVGALR	V	18	224	10269	0.74	0.641
	R	STLSVGVSGTLVLLQGAR	G	18	222	3706	0.68	0.541
CRP	K	ESDTSYVSLK	A	10	417	3526	0.7	0.404
	R	QDNEILIFWSK	D	11	113	4733	0.71	0.53
	K	RQDNEILIFWSK	D	12	521	N/A	N/A	N/A
	K	YEVQGEVFTKPQLWP	-	15	155	N/A	0.66	0.501
	K	AFTVCLHFYTELSSTR	G	16	N/A	1693	0.61	0.45
	K	APLTKPLK	A	8	N/A	350	0.57	0.212
DPP4	R	LGTFEVEDQIEAAR	Q	14	81	659	0.77	0.636
	K	AGAVNPTVK	F	9	76	70	0.54	0.347
	R	VLEDNSALDK	M	10	54	223	0.75	0.523
	K	LAYVWNNDIYVK	I	12	48	303	0.7	0.469
	K	IISNEEGYR	H	9	37	18	0.73	0.394
	R	FRPSEPHFTLDGNSFYK	I	17	20	526	0.66	0.389
FABP4	K	STITLDGGVLVHVQK	W	15	3	108	0.74	N/A
	K	VAGMAKPNMIISVNGDVITIK	S	21	N/A	N/A	0.57	N/A
	K	LVVECVMK	G	8	N/A	23	0.76	N/A
	K	EVGVGFATR	K	9	19	70	0.75	N/A
	K	NTEISFILGQEFDEVTADDR	K	20	12	128	0.69	N/A
FGF21	K	ALKPGVIQILGVK	T	13	N/A	N/A	0.7	0.243
	R	EDGTVGGAADQSPESLLQLK	A	20	N/A	N/A	0.75	0.894
	R	YLYTDDAQQTEAHLEIR	E	17	N/A	N/A	0.72	0.644
ICAM1	K	ASVSVTAEDEGTQR	L	14	149	2829	0.8	0.657
	K	DGTFPLPIGESVTVTR	D	16	91	3845	0.75	0.877
	R	VELAPLPSWQPVGK	N	14	86	1495	0.75	0.798
	K	TFLTVYWTPER	V	11	73	1208	0.69	0.603
	K	VTLNGVPAQPLGPR	A	14	61	2307	0.82	0.78
	R	DLEGTYLCR	A	9	13	968	0.76	0.486
IGF1	A	GPETLCGAELVDALQFVCGDR	G	21	239	N/A	0.02	0.329
	R	GFYFNKPTGYGSSSR	R	15	57	971	0.66	0.356
	R	APQTGIVDECCFR	S	13	33	360	0.79	0.599
	R	LEMYCAPLKPAK	S	12	N/A	103	0.7	0.257
IGFBP1	R	ALPGEQQPLHALTR	G	14	45	230	0.81	0.833
	K	FYLPNCNK	N	8	17	18	0.75	0.345
	R	IPGSPEIR	G	8	15	N/A	0.72	0.258
	R	APWQCAPCSAEK	L	12	12	N/A	0.24	0.308
	K	ALHVTNIK	K	8	22	N/A	0.68	0.344
IGFBP2	R	GECWCVNPNTGK	L	12	79	382	0.78	0.401
	R	TPCQQELDQVLER	I	13	73	1581	0.81	0.714
	R	LEGEACGVYTPR	C	12	39	714	0.79	0.684
	K	LIQGAPTIR	G	9	38	672	0.79	0.448
	R	CPPCTPER	L	8	32	18	0.66	0.283
	R	EPGCGCCSVCAR	L	12	12	161	0.81	0.329
IGFBP3	K	YGQPLPGYTTK	G	11	242	1912	0.75	0.507
	R	ALAQCAPPPAVCAELVR	E	17	232	11259	0.81	0.642
	R	CQPSPDEARPLQALLDGR	G	18	212	10132	0.8	0.579
	K	FLNVLSPR	G	8	205	4320	0.79	0.514
	R	EPGCGCCLTCALSEGQPCGIYTER	C	24	113	3196	0.69	0.539
	R	GFCWCVDK	Y	8	75	794	0.71	0.252
	R	SAGSVESPSVSSTHR	V	15	203	1715	0.8	0.559
LBP	R	VQLYDLGLQIHK	D	12	525	344	0.72	0.528
	R	ITLPDFTGDLR	I	11	438	861	0.76	0.701
	K	GLQYAAQEGLLALQSELLR	I	19	207	1481	0.64	0.526
	K	ITGFLKPGK	V	9	174	192	0.61	0.233
	R	SPVTLLAAVMSLPEEHNK	M	18	183	1350	0.74	0.762
	K	SFRPFVPR	L	8	60	342	0.76	0.228
	K	LQGSFDVSVK	G	10	76	12	0.75	0.529
LCN2	R	TFVPGCQPGEFTLGNIK	S	17	144	2515	0.72	0.838
	K	VPLQQNFQDNQFQGK	W	15	116	1410	0.79	0.692
	K	WYVVGLAGNAILR	E	13	21	988	0.71	0.376
	K	SYPGLTSYLVR	V	11	17	899	0.73	0.603
	K	MYATIYELK	E	9	17	195	0.67	0.296
LEP	R	NVIQISNDLENLR	D	13	10	173	0.81	0.684
	K	VTGLDFIPGLHPILTLSK	M	18	8	225	0.58	0.771
	R	INDISHTQSVSSK	Q	13	4	50	0.77	0.601
	R	DLLHVLAFSK	S	10	3	76	0.75	0.571
	K	MDQTLAVYQQILTSMPSR	N	18	N/A	215	0.6	0.592
LPA	R	LFLEPTQADIALLK	L	14	148	1052	0.67	0.769
	R	GTLSTTITGR	T	10	34	366	0.69	0.372
	R	TPAYYPNAGLIK	N	12	73	1160	0.76	0.645
	R	TPENYPNAGLTR	N	12	64	640	0.81	0.722
	R	GSFSTTVTGR	T	10	60	409	0.62	0.426
	K	YICAEHLAR	G	9	11	245	0.79	0.47
	R	TPENYPNAGLTENYCR	N	16	16	1951	0.81	0.742
MMP2	R	AFQVWSDVTPLR	F	12	30	319	0.75	0.719
	R	IIGYTPDLDPETVDDAFAR	A	19	24	740	0.7	0.851
	K	IDAVYEAPQEEK	A	12	20	82	0.79	0.547
	R	WEHGDGYPFDGK	D	12	11	63	0.74	0.592
	R	GYPKPLTSLGLPPDVQR	V	17	N/A	326	0.73	0.604
	K	AVFFAGNEYWIYSASTLER	G	19	N/A	120	0.45	0.372
	R	FQGTSYDSCTTEGR	T	14	1	155	0.75	0.617
MMP9	R	AFALWSAVTPLTFTR	V	15	14	186	0.61	0.579
	K	SLGPALLLLQK	Q	11	4	396	0.74	0.493
	K	LGLGADVAQVTGALR	S	15	4	115	0.78	0.663
	R	AVIDDAFAR	A	9	5	33	0.78	0.474
	R	QSTLVLFPGDLR	T	12	3	231	0.75	0.85
	K	QLSLPETGELDSATLK	A	16	3	117	0.72	0.874
	R	FGNADGAACHFPFIFEGR	S	18	N/A	177	0.72	0.715
NPY	A	YPSKPDNPGEDAPAEDMAR	Y	19	N/A	N/A	0.8	0.573
	R	SSPETLISDLLMR	E	13	N/A	N/A	0.72	0.664
	R	ESTENVPR	T	8	N/A	N/A	0.15	0.228
	R	LEDPAMW	-	7	N/A	N/A	0.77	0.105
PAI-1	R	FIINDWVK	T	8	16	15	0.74	0.298
	R	VFQQVAQASK	D	10	14	40	0.77	0.353
	K	EVPLSALTNILSAQLISHWK	G	20	9	125	0.58	0.576
	R	QFQADFTSLSDQEPLHVAQALQK	V	23	2	247	0.65	0.709
	K	LVQGFMPHFFR	L	11	1	89	0.71	0.377
	K	QVDFSEVER	A	9	5	8	0.77	0.417
PON1	K	IFFYDSENPPASEVLR	I	16	1101	18804	0.71	0.848
	K	YVYIAELLAHK	I	11	1537	8191	0.71	0.421
	R	VVAEGFDFANGINISPDGK	Y	19	1168	7463	0.74	0.74
	R	IQNILTEEPK	V	10	1063	6095	0.79	0.422
	K	SFNPNSPGK	I	9	832	2863	0.11	0.23
	R	EVQPVELPNCNLVK	G	14	612	9723	0.81	0.686
	K	LIALTLLGMGLALFR	N	15	289	2313	0.48	0.352
RBP4	K	GNDDHWIVDTDYDTYAVQYSCR	L	22	551	124216	0.63	0.436
	R	LLNLDGTCADSYSFVFSR	D	18	2586	103681	0.59	0.504
	R	DPNGLPPEAQK	I	11	3634	41491	0.76	0.433
	R	LIVHNGYCDGR	S	11	831	52521	0.8	0.6
	K	YWGVASFLQK	G	10	1501	35018	0.68	0.4
	R	QEELCLAR	Q	8	36	5844	0.75	0.319
RETN	R	AISSIGLECQSVTSR	G	15	N/A	27	0.76	0.597
	R	IQEVAGSLIFR	A	11	2	13	0.76	0.58
	R	GDLATCPR	G	8	N/A	N/A	0.46	0.275
	R	GFAVTGCTCGSACGSWDVR	A	19	N/A	N/A	0.71	0.369
	R	AETTCHCQCAGMDWTGAR	C	18	N/A	3	0.77	0.365
	K	TLCSMEEAINER	I	12	N/A	1	0.79	0.472
SELE	R	YGSSCEFSCEQGFVLK	G	16	23	626	0.61	0.504
	K	NWAPGEPNNR	Q	10	41	8	0.51	0.309
	R	YTHLVAIQNK	E	10	29	7	0.78	0.492
	R	LQCGPTGEWDNEKPTCEAVR	C	20	44	2	0.76	0.465
	R	GYMNCLPSASGSFR	Y	14	N/A	113	0.74	0.544
	R	CAHSPIGEFTYK	S	12	N/A	58	0.76	0.64
	R	CSHSPAGEFTFK	S	12	N/A	25	0.76	0.657
SERPINB1	K	TFHFNTVEEVHSR	F	13	27	171	0.8	0.571
	K	TYNFLPEFLVSTQK	T	14	25	205	0.65	0.722
	R	LGVQDLFNSSK	A	11	23	89	0.76	0.664
	K	EATTNAPFR	L	9	21	45	0.65	0.341
	K	IEEQLTLEK	L	9	16	8	0.76	0.296
	R	HNSSGSILFLGR	F	12	N/A	25	0.78	0.693
	K	TYGADLASVDFQHASEDAR	K	19	15	N/A	0.76	0.685
SHBG	R	IALGGLLFPASNLR	L	14	431	11477	0.73	0.691
	R	DIPQPHAEPWAFSLDLGLK	Q	19	565	6465	0.67	0.907
	K	MEGDSVLLEVDGEEVLR	L	17	372	6188	0.71	0.51
	R	TWDPEGVIFYGDTNPK	D	16	415	1822	0.7	0.793
	K	QAEISASAPTSLR	S	13	214	3074	0.8	0.568
	R	VVLSQGSK	M	8	179	1083	0.52	0.252
SOD3	R	LACCVVGVCGPGLWER	Q	16	151	1313	0.73	0.394
	R	AVVVHAGEDDLGR	G	13	142	1011	0.82	0.719
	R	AGLAASLAGPHSIVGR	A	16	64	2252	0.8	0.709
	R	VTGVVLFR	Q	8	91	717	0.78	0.367
	R	DDDGALHAACQVQPSATLDAAQPR	V	24	29	147	0.81	0.896
	A	WTGEDSAEPNSDSAEWIR	D	18	N/A	N/A	0.75	0.46
TIMP1	K	GFQALGDAADIR	F	12	62	913	0.79	0.572
	R	FVYTPAMESVCGYFHR	S	16	6	1585	0.61	0.477
	R	EPGLCTWQSLR	S	11	9	1301	0.77	0.59
	K	LQSGTHCLWTDQLLQGSEK	G	19	N/A	1472	0.64	0.593
	R	SEEFLIAGK	L	9	20	142	0.73	0.354
	R	HLACLPR	E	7	N/A	325	0.72	0.251
TIMP2	R	SDGSCAWYR	G	9	10	50	0.6	0.455
	K	NINGHQAK	F	8	42	N/A	0	0.25
	R	YQMGCECK	I	8	N/A	67	0.43	0.275
	-	CSCSPVHPQQAFCNADVVIR	A	20	N/A	N/A	0.8	0.589
	K	EYLIAGK	A	7	N/A	N/A	0.59	0.221
	K	EVDSGNDIYGNPIK	R	14	54	100	0.79	0.634
VCAM1	K	SLEVTFTPVIEDIGK	V	15	235	1884	0.68	0.797
	K	ELQVYISPK	N	9	173	180	0.76	0.42
	K	NTVISVNPSTK	L	11	146	363	0.78	0.551
	K	DAGVYECESK	N	10	121	133	0.63	0.412
	K	EVELIVQEKPFTVEISPGPR	I	20	84	2069	0.66	0.726
	R	QSTQTLYVNVAPR	D	13	56	2069	0.8	0.71
VWF	R	EGGPSQIGDALGFAVR	Y	16	168	3129	0.78	0.723
	K	VIVIPVGIGPHANLK	Q	15	377	2340	0.77	0.811
	R	LSEAEFEVLK	A	10	292	607	0.75	0.436
	R	ILAGPAGDSNVVK	L	13	273	2297	0.8	0.749
	K	SVGSQWASPENPCLINECVR	V	20	232	2178	0.78	0.57
	K	YAGSQVASTSEVLK	Y	14	229	753	0.74	0.587
	R	VTVFPIGIGDR	Y	11	337	670	0.77	0.704
APOA4	K	SELTQQLNALFQDK	L	14	4280	20568	0.75	0.678
	R	LLPHANEVSQK	I	11	3450	12703	0.8	0.559
	K	LGPHAGDVEGHLSFLEK	D	17	3224	65573	0.75	0.756
	K	LVPFATELHER	L	11	2023	12076	0.79	0.721
	R	SLAPYAQDTQEK	L	12	1705	8403	0.78	0.521
	R	ISASAEELR	Q	9	1530	7827	0.71	0.315
APOL1	R	VTEPISAESGEQVER	V	15	1010	9740	0.8	0.717
	K	WWTQAQAHDLVIK	S	13	948	6273	0.7	0.488
	K	LNILNNNYK	I	9	497	5680	0.76	0.422
	K	VAQELEEK	L	8	748	650	0.55	0.236
	R	ALADGVQK	V	8	622	977	0.31	0.256
	K	SELEDNIR	R	8	84	237	0.46	0.279
ATRN	R	LTGSSGFVTDGPGNYK	Y	16	805	11825	0.73	0.698
	R	WSVLPRPDLHHDVNR	F	15	616	2697	0.8	0.198
	R	YGHSLALYK	D	9	435	4240	0.72	0.431
	K	EQYAVVGHSAHIVTLK	N	16	336	3931	0.75	0.545
	R	SVNNVVVR	Y	8	164	6088	0.74	0.443
	R	ALYVHGGYK	A	9	141	4696	0.72	0.39
	K	HCETCISGFYGDPTNGGK	C	18	101	6843	0.75	0.594
APOM	K	WIYHLTEGSTDLR	T	13	1045	N/A	0.7	0.596
	K	EFPEVHLGQWYFIAGAAPTK	E	20	485	N/A	0.55	0.678
	K	SLTSCLDSK	A	9	110	N/A	0.59	0.353
	R	NQEACELSNN	-	10	42	N/A	0.6	0.353
	R	TEGRPDMK	T	8	454	N/A	0.01	0.225
APOA2	K	SPELQAEAK	S	9	2227	20820	0.51	0.25
	K	EPCVESLVSQYFQTVTDYGK	D	20	1457	90082	0.56	0.594
	K	AGTELVNFLSYFVELGTQPATQ	-	22	917	N/A	0.59	0.514
	K	EQLTPLIK	K	8	675	6824	0.76	0.332
APOC3	K	DALSSVQESQVAQQAR	G	16	1614	67007	0.81	0.595
	K	DYWSTVK	D	7	442	8364	0.51	0.279
	K	FSEFWDLDPEVRPTSAVAA	-	19	168	N/A	0.67	0.601
APOH	K	CSYTEDAQCIDGTIEVPK	C	18	2524	10180	0.72	0.658
	R	VCPFAGILENGAVR	Y	14	1933	9614	0.79	0.684
	K	ATVVYQGER	V	9	1772	4784	0.75	0.364
	K	TFYEPGEEITYSCKPGYVSR	G	20	1575	8713	0.49	0.442
	R	TCPKPDDLPFSTVVPLK	T	17	1744	14472	0.69	0.501
AHSG	K	HTLNQIDEVK	V	10	2817	20372	0.76	0.506
	K	EHAVEGDCDFQLLK	L	14	1741	21777	0.77	0.691
	K	FSVVYAK	C	7	972	6444	0.71	0.256
	K	VCQDCPLLAPLNDTR	V	15	N/A	908	0.8	0.733
	K	CDSSPDSAEDVR	K	12	81	893	0.73	0.395
	R	HTFMGVVSLGSPSGEVSHPR	K	20	3499	45817	0.74	0.634
APOD	R	NPNLPPETVDSLK	N	13	1044	58006	0.82	0.668
	K	MTVTDQVNCPK	L	11	272	29902	0.79	0.455
	K	CPNPPVQENFDVNK	Y	14	158	88008	0.83	0.749
	K	IPTTFENGR	C	9	145	51639	0.73	0.389
	K	VLNQELR	A	7	620	N/A	0.7	0.298
	K	NILTSNNIDVK	K	11	903	53465	0.8	0.592
AZGP1	R	YSLTYIYTGLSK	H	12	1822	45803	0.55	0.46
	K	EIPAWVPFDPAAQITK	Q	16	1565	42839	0.72	0.831
	R	AGEVQEPELR	G	10	1123	21808	0.79	0.425
	K	IDVHWTR	A	7	743	6437	0.68	0.289
	K	CLAYDFYPGK	I	10	670	30900	0.72	0.495
	K	WEAEPVYVQR	A	10	448	4799	0.78	0.483
CP	K	LISVDTEHSNIYLQNGPDR	I	19	3421	63200	0.77	0.762
	K	ALYLQYTDETFR	T	12	2539	37253	0.69	0.589
	K	HYYIGIIETTWDYASDHGEK	K	20	2322	73896	0.48	0.516
	K	GAYPLSIEPIGVR	F	13	2034	50674	0.77	0.825
	R	QSEDSTFYLGER	T	12	1713	13381	0.75	0.671
	R	IYHSHIDAPK	D	10	3910	15890	0.77	0.46
CTSB	K	NGPVEGAFSVYSDFLLYK	S	18	78	414	0.54	0.618
	R	DQGSCGSCWAFGAVEAISDR	I	20	92	147	0.71	0.475
	R	EQWPQCPTIK	E	10	47	99	0.78	0.282
	K	LPASFDAR	E	8	15	41	0.73	0.351
	K	ICEPGYSPTYK	Q	11	N/A	101	0.75	0.476
F10	R	NTEQEEGGEAVHEVEVVIK	H	19	1024	30022	0.8	0.492
	K	TGIVSGFGR	T	9	489	7397	0.68	0.441
	K	ETYDFDIAVLR	L	11	387	6837	0.74	0.625
	K	QEDACQGDSGGPHVTR	F	16	139	8509	0.81	0.711
	K	ACIPTGPYPCGK	Q	12	161	2434	0.79	0.398
F2	R	ELLESYIDGR	I	10	2297	5795	0.76	0.55
	K	GQPSVLQVVNLPIVERPVCK	D	20	1551	4904	0.74	0.502
	R	VTGWGNLK	E	8	1328	2004	0.53	0.272
	R	IVEGSDAEIGMSPWQVMLFR	K	20	919	14407	0.46	0.502
	K	HQDFNSAVQLVENFCR	N	16	515	15788	0.8	0.552
	K	LAACLEGNCAEGLGTNYR	G	18	290	19833	0.78	0.516
FGB	K	AHYGGFTVQNEANK	Y	14	2311	15056	0.79	0.614
	K	DNENVVNEYSSELEK	H	15	2100	17114	0.8	0.553
	K	HQLYIDETVNSNIPTNLR	V	18	1461	30799	0.79	0.751
	K	EDGGGWWYNR	C	10	1514	9259	0.69	0.46
	K	NYCGLPGEYWLGNDK	I	15	784	12524	0.72	0.562
	R	EEAPSLRPAPPPISGGGYR	A	19	925	8243	0.79	0.696
GIP	K	IHQQDFVNWLLAQK	G	14	N/A	N/A	0.72	0.533
	R	YAEGTFISDYSIAMDK	I	16	N/A	N/A	0.54	0.561
	K	EGHFSALPSLPVGSHAK	V	17	N/A	N/A	0.77	0.702
	K	NPSDEDLLR	D	9	N/A	N/A	0.7	0.367
	K	EEEAVEPQSSPAK	N	13	N/A	N/A	0.8	0.416
HP	R	VGYVSGWGR	N	9	668	12390	0.72	0.417
	K	VTSIQDWVQK	T	10	1117	15800	0.75	0.347
	K	YVMLPVADQDQCIR	H	14	1439	30520	0.75	0.595
	K	SCAVAEYGVYVK	V	12	1150	N/A	0.74	0.422
	K	SPVGVQPILNEHTFCAGMSK	Y	20	1172	43609	0.71	0.733
	R	ILGGHLDAK	G	9	3049	N/A	0.69	0.435
LCAT	R	SSGLVSNAPGVQIR	V	14	350	4751	0.81	0.734
	R	STELCGLWQGR	Q	11	66	2915	0.76	0.503
	R	LEPGQQEEYYR	K	11	163	1380	0.78	0.558
	R	ITTTSPWMFPSR	M	12	172	4755	0.7	0.519
	R	AAPYDWR	L	7	3	548	0.62	0.292
LRG1	R	TLDLGENQLETLPPDLLR	G	18	2552	35572	0.74	0.811
	K	ALGHLDLSGNR	L	11	2031	11810	0.78	0.646
	K	DLLLPQPDLR	Y	10	1291	24626	0.8	0.602
	K	ENQLEVLEVSWLHGLK	A	16	1004	30436	0.69	0.543
	R	YLFLNGNK	L	8	1480	16339	0.73	0.362
	R	VAAGAFQGLR	Q	10	999	25378	0.78	0.447
MBL2	K	TEGQFVDLTGNR	L	12	324	959	0.79	0.677
	K	WLTFSLGK	Q	8	290	1662	0.68	0.356
	R	NAAENGAIQNLIK	E	13	272	1215	0.81	0.597
	K	FQASVATPR	N	9	194	2453	0.77	0.435
	K	FFLTNGEIMTFEK	V	13	418	3240	0.59	0.627
PLG	K	VILGAHQEVNLEPHVQEIEVSR	L	22	5567	11573	0.77	0.581
	R	TECFITGWGETQGTFGAGLLK	E	21	4948	17829	0.43	0.427
	R	HSIFTPETNPR	A	11	2581	6726	0.81	0.588
	R	ATTVTGTPCQDWAAQEPHR	H	19	1235	7095	0.8	0.802
	R	FVTWIEGVMR	N	10	1198	6899	0.69	0.291
	K	EAQLPVIENK	V	10	1219	3506	0.8	0.444
PRG4	K	GFGGLTGQIVAALSTAK	Y	17	262	9392	0.69	0.556
	R	ITEVWGIPSPIDTVFTR	C	17	184	7584	0.63	0.742
	R	VCTAELSCK	G	9	118	3197	0.73	0.347
	R	GGSIQQYIYK	Q	10	113	2979	0.71	0.381
	R	AIGPSQTHTIR	I	11	39	425	0.79	0.58
	R	GLPNVVTSAISLPNIR	K	16	211	5545	0.79	0.743
PROS1	K	IETISHEDLQR	Q	11	1185	3996	0.79	0.566
	K	SQDILLSVENTVIYR	I	15	313	2798	0.71	0.637
	R	IQALSLCSDQQSHLEFR	V	17	278	1963	0.73	0.565
	R	QSTNAYPDLR	S	10	443	2320	0.76	0.516
	R	SFQTGLFTAAR	Q	11	442	1858	0.76	0.608
	R	FSAEFDFR	T	8	325	719	0.74	0.524
PYY	R	HYLNLVTR	Q	8	N/A	3	0.78	0.441
	R	EDASPEELNR	Y	10	N/A	N/A	0.62	0.332
	A	YPIKPEAPR	E	9	N/A	N/A	0.75	0.255
	K	TFFPDGEDRPVR	S	12	N/A	6	0.79	0.316
	R	DGPDTLLSK	T	9	N/A	3	0.6	0.272
SAA1	R	FFGHGAEDSLADQAANEWGR	S	20	536	24538	0.75	0.604
	R	GPGGVWAAEAISDAR	E	15	69	3162	0.79	0.611
	R	SFFSFLGEAFDGAR	D	14	288	N/A	0.65	0.701
	R	EANYIGSDK	Y	9	347	N/A	0.25	0.296
	K	DPNHFRPAGLPEK	Y	13	231	N/A	0.81	0.285
SERPINA1	K	LQHLENELTHDIITK	F	15	3436	N/A	0.76	0.626
	K	LSITGTYDLK	S	10	2927	N/A	0.71	0.452
	K	DTEEEDFHVDQVTTVK	V	16	1766	27442	0.77	0.649
	K	SVLGQLGITK	V	10	1237	N/A	0.75	0.417
SERPINA3	K	ITLLSALVETR	T	11	3290	14232	0.75	0.587
	R	NLAVSQVVHK	A	10	3190	10337	0.8	0.539
	K	EQLSLLDR	F	8	1189	2671	0.76	0.478
	R	EIGELYLPK	F	9	2061	9384	0.75	0.386
	K	ADLSGITGAR	N	10	1967	5735	0.67	0.391
SERPINC1	K	TSDQIHFFFAK	L	11	4329	35624	0.71	0.598
	R	FATTFYQHLADSK	N	13	3125	20325	0.7	0.678
	R	EVPLNTIIFMGR	V	12	1918	36382	0.74	0.662
	R	DDLYVSDAFHK	A	11	2223	12952	0.75	0.648
	K	ANRPFLVFIR	E	10	1493	21601	0.77	0.25
SERPINF1	K	EIPDEISILLLGVAHFK	G	17	2343	36367	0.61	0.755
	K	LAAAVSNFGYDLYR	V	14	1246	32120	0.71	0.495
	K	LQSLFDSPDFSK	I	12	1813	14206	0.72	0.697
	R	DTDTGALLFIGK	I	12	1222	12761	0.73	0.612
	K	ELLDTVTAPQK	N	11	1034	9657	0.79	0.648
	K	TVQAVLTVPK	L	10	1049	7622	0.79	0.549
SERPING1	K	GVTSVSQIFHSPDLAIR	D	17	2971	21649	0.73	0.814
	R	LVLLNAIYLSAK	W	12	4171	16381	0.68	0.421
	K	TNLESILSYPK	D	11	2064	6593	0.75	0.604
	K	YPVAHFIDQTLK	A	12	1979	3875	0.74	0.673
	R	LLDSLPSDTR	L	10	1849	4371	0.78	0.528
	R	TLYSSSPR	V	8	1253	3629	0.6	0.292
C1QA	R	SLGFCDTTNK	G	10	549	865	0.66	0.394
	K	GHIYQGSEADSVFSGFLIFPSA	-	22	514	N/A	0.52	0.542
	K	DQPRPAFSAIR	R	11	186	262	0.79	0.275
CFI	R	VFSLQWGEVK	L	10	1445	2424	0.71	0.435
	R	AQLGDLPWQVAIK	D	13	1163	2926	0.74	0.674
	R	IVIEYVDR	I	8	747	1292	0.78	0.356
	R	GLETSLAECTFTK	R	13	735	4108	0.72	0.619
	K	VFCQPWQR	C	8	74	2339	0.78	0.263
FGF1	K	AILFLPLPVSSD	-	12	N/A	N/A	0.75	0.396
	K	LLYCSNGGHFLR	I	12	N/A	N/A	0.75	0.512
	R	LEENHYNTYISK	K	12	N/A	N/A	0.77	0.605
	-	FNLPPGNYK	K	9	N/A	N/A	0.77	0.395
S100A9	K	LGHPDTLNQGEFK	E	13	256	2282	0.79	0.729
	K	VIEHIMEDLDTNADK	Q	15	185	1905	0.77	0.61
	R	NIETIINTFHQYSVK	L	15	175	4923	0.72	0.608
	K	QLSFEEFIMLMAR	L	13	10	1415	0.58	0.44
	K	DLQNFLK	K	7	5	479	0.63	0.238
GRP	A	VPLPAGGGTVLTK	M	13	N/A	N/A	0.78	0.705
	R	GNHWAVGHLM	-	12	N/A	N/A	0.76	0.419
LEPR	K	ISWSSPPLVPFPLQYQVK	Y	18	19	43	0.54	0.811
	K	IPQSQYDVVSDHVSK	V	15	13	69	0.77	0.635
	K	SVSLPVPDLCAVYAVQVR	C	18	13	42	0.72	0.608
	K	TTFHCCFR	S	8	5	21	0.75	0.365
	R	WSTSTIQSLAESTLQLR	Y	17	4	72	0.64	0.517
	R	LDGPGIWSDWSTPR	V	14	3	41	0.72	0.69
	K	IVSATSLLVDSILPGSSYEVQVR	G	23	3	27	0.5	0.492
FSTL-1	K	LSFQEFLK	C	8	46	213	0.72	0.362
	R	DACLTGSK	I	8	55	16	0.06	0.241
	K	ICANVFCGAGR	E	11	17	94	0.8	0.49
	K	IQVDYDGHCK	E	10	6	120	0.74	0.431
	K	TYLNHCELHR	D	10	6	188	0.8	0.47
	R	IIQWLEAEIIPDGWFSK	G	17	5	96	0.42	0.512
IGF2	A	AYRPSETLCGGELVDTLQFVCGDR	G	24	N/A	N/A	0.57	0.273
	A	YRPSETLCGGELVDTLQFVCGDR	G	23	N/A	N/A	N/A	N/A
	R	SCDLALLETYCATPAK	S	16	225	4038	0.7	0.674
	R	GFYFSRPASR	V	10	77	271	0.73	0.238
	R	GIVEECCFR	S	9	18	2348	0.78	0.387
PPY	R	YINMLTRPR	Y	9	N/A	N/A	0.76	0.22
	K	EDTLAFSEWGSPHAAVPR	E	18	N/A	N/A	0.76	0.78

## Sheet: Supply_Table 2
Supplemental Table 2. The list of detetable proteins in non-depletion plasma
Gene symbol	peptide_sequence	Precursor m/z	Precursor Charge	Collision Energy	Fragment Ion
APOB	SVSDGIAALDLNAVANK	833.449	2	27.8	1107.62	1036.59	965.551	852.467	737.44	439.275	340.207
APOB	SVSLPSLDPASAK	640.353	2	22	1093.6	893.482	796.429	596.313	481.286	503.787	447.245
APOB	GFEPTLEALFGK	658.852	2	22.6	983.565	886.512	672.381	543.338	472.301	359.217	492.286
AGT	DPTFIPAPIQAK	653.368	2	22.4	992.602	845.533	732.449	635.397	564.36	354.223	366.728
AGT	LQAILGVPWK	566.852	2	19.8	1019.61	891.554	820.517	707.433	594.349	537.327	438.259
APOE	LQAEAFQAR	522.279	2	18.4	930.467	802.408	731.371	602.328	531.291	384.223	465.737
APOE	LAVYQAGAR	479.771	2	17.1	845.45	774.413	675.345	512.281	384.223	313.186	387.71
CD14	FPAIQNLALR	576.842	2	20.1	750.413	651.345	537.302	440.249	353.217	326.176	269.155
CD14	LTVGAAQVPAQLLVGALR	894.042	2	29.6	550.38	422.285	766.458	709.916	674.397	609.876	553.334
CRP	ESDTSYVSLK	568.782	2	19.8	1007.51	920.481	805.455	704.407	617.375	454.312	355.243
CRP	RQDNEILIFWSK	519.615	3	21.9	914.559	801.475	688.391	575.307	428.238	401.241	344.699
IGFBP3	YGQPLPGYTTK	616.824	2	21.3	884.497	787.444	674.36	577.307	357.222	442.752	337.684
IGFBP3	CQPSPDEARPLQALLDGR	678.342	3	27.9	872.964	824.438	780.922	674.882	610.361	582.312	520.95
LBP	ITLPDFTGDLR	629.339	2	21.6	1043.54	930.455	833.403	718.376	571.307	522.273	465.731
LBP	SFRPFVPR	339.195	3	15	625.37	528.317	381.248	464.773	391.239	313.188	310.185
LPA	LFLEPTQADIALLK	790.463	2	26.5	1319.77	1206.68	1077.64	751.48	565.416	452.332	539.323
LPA	TPENYPNAGLTR	671.835	2	22.9	1144.56	1015.52	901.477	738.413	456.28	621.311	369.71
LPA	GSFSTTVTGR	511.761	2	18.1	878.461	731.392	644.36	543.312	442.265	343.196	439.734
PON1	IFFYDSENPPASEVLR	947.466	2	31.2	1486.7	1323.64	1208.61	1121.58	992.54	878.497	781.444
PON1	IQNILTEEPK	596.837	2	20.7	1079.58	951.524	837.481	724.397	611.313	510.265	381.222
PON1	EVQPVELPNCNLVK	823.937	2	27.5	1290.7	1193.64	1094.58	965.533	852.449	645.852	426.728
RBP4	LIVHNGYCDGR	438.548	3	18.8	851.334	737.291	517.206	357.176	600.776	544.234	494.7
RBP4	YWGVASFLQK	603.823	2	20.9	1043.58	857.497	800.476	701.407	630.37	543.338	396.27
SHBG	IALGGLLFPASNLR	726.434	2	24.5	1267.74	1154.66	1097.63	927.529	814.445	667.376	412.254
SHBG	QAEISASAPTSLR	670.856	2	22.9	1141.61	1012.57	899.482	812.45	741.413	654.381	583.344
VWF	EGGPSQIGDALGFAVR	792.406	2	26.5	1156.63	1028.58	915.492	743.444	672.407	559.323	355.233
VWF	ILAGPAGDSNVVK	624.856	2	21.5	1022.54	951.499	894.477	797.424	726.387	476.253	447.742
VWF	YAGSQVASTSEVLK	724.38	2	24.5	1213.65	1069.6	941.539	842.471	771.434	684.402	292.181
APOA4	LVPFATELHER	441.243	3	18.9	865.44	794.403	555.284	506.758	433.224	282.66	370.525
APOA4	SLAPYAQDTQEK	679.838	2	23.2	1158.55	1087.51	990.462	827.398	513.276	579.779	544.261
APOA4	ISASAEELR	493.263	2	17.6	872.435	785.403	714.366	627.334	556.296	427.254	393.205
APOL1	VTEPISAESGEQVER	820.904	2	27.4	1311.64	1101.5	1014.47	943.435	814.393	727.361	656.324
APOL1	LNILNNNYK	557.311	2	19.5	1000.53	886.487	773.403	660.319	546.276	432.233	443.747
ATRN	YGHSLALYK	353.862	3	15.6	702.428	615.396	502.312	431.274	448.758	420.247	299.508
ATRN	SVNNVVVR	448.763	2	16.2	809.487	710.418	596.375	482.332	383.264	405.247	355.713
APOM	WIYHLTEGSTDLR	534.271	3	22.5	888.43	787.382	658.339	514.286	707.864	651.322	301.163
APOM	SLTSCLDSK	509.752	2	18.1	818.38	717.333	630.301	470.27	357.186	409.694	359.17
APOA2	SPELQAEAK	490.761	2	17.5	893.482	796.429	667.386	554.302	426.244	355.207	447.245
APOA2	EQLTPLIK	475.294	2	17	692.48	579.396	478.348	381.295	410.773	346.743	290.201
APOC3	DYWSTVK	453.726	2	16.4	791.418	628.354	442.275	355.243	396.213	314.681
APOC3	DALSSVQESQVAQQAR	576.291	3	24.1	897.478	810.446	682.387	583.319	512.281	384.223	299.831
APOH	TFYEPGEEITYSCKPGYVSR	798.371	3	32.5	1063.52	688.365	1073	991.464	926.942	878.416	618.297
APOH	TCPKPDDLPFSTVVPLK	641.344	3	26.6	995.602	898.549	751.48	464.332	365.264	830.974	498.304
AHSG	HTLNQIDEVK	602.824	2	20.9	1067.58	966.535	853.451	739.408	611.349	498.265	383.238
AHSG	FSVVYAK	411.236	2	15.1	674.396	587.364	488.296	389.227	337.702	294.186
APOD	MTVTDQVNCPK	650.809	2	22.3	1068.52	969.455	868.407	753.38	625.322	526.253	412.21
APOD	IPTTFENGR	522.771	2	18.4	931.451	834.398	733.35	632.303	485.234	356.192	466.229
APOD	NILTSNNIDVK	619.845	2	21.4	1011.56	898.472	797.424	710.392	596.349	482.306	369.222
AZGP1	EIPAWVPFDPAAQITK	895.982	2	29.7	1380.74	1194.66	1095.59	736.444	774.919	548.3	426.239
AZGP1	IDVHWTR	468.75	2	16.8	823.408	708.382	609.313	472.254	412.208	354.694	305.16
AZGP1	WEAEPVYVQR	643.824	2	22.1	1100.56	971.518	900.481	771.439	575.318	386.223	288.162
CP	LISVDTEHSNIYLQNGPDR	727.699	3	29.8	972.477	809.414	696.33	568.271	454.228	977.96	884.91
CP	ALYLQYTDETFR	765.379	2	25.7	1182.57	1069.48	941.424	778.361	677.313	562.286	433.243
F10	TGIVSGFGR	452.25	2	16.3	802.445	745.423	632.339	533.271	446.239	389.217	373.215
F10	ETYDFDIAVLR	676.342	2	23	1121.59	958.523	843.496	696.428	581.401	468.317	397.28
F2	ELLESYIDGR	602.808	2	20.8	962.482	849.398	720.355	633.323	470.26	357.176	481.744
F2	GQPSVLQVVNLPIVERPVCK	747.427	3	30.6	1105.63	1028.1	886.521	829.979	765.949	716.415	685.734
FGB	AHYGGFTVQNEANK	515.251	3	21.8	810.42	711.351	583.293	469.25	340.207	405.713	356.179
FGB	EDGGGWWYNR	625.267	2	21.5	1005.46	948.435	891.414	834.392	648.313	462.233	417.7
FGB	EEAPSLRPAPPPISGGGYR	654.342	3	27	913.477	816.424	606.287	851.967	816.448	505.768	457.242
HP	YVMLPVADQDQCIR	859.417	2	28.5	1211.57	1015.45	944.413	829.386	586.301	662.831	606.289
HP	SPVGVQPILNEHTFCAGMSK	727.362	3	29.8	909.405	998.497	948.963	920.452	870.918	806.889	698.351
LCAT	SSGLVSNAPGVQIR	697.885	2	23.7	1050.59	951.525	864.493	750.45	679.413	582.36	426.27
LCAT	STELCGLWQGR	658.818	2	22.5	1128.55	999.507	886.423	726.392	669.371	556.287	370.207
LCAT	ITTTSPWMFPSR	717.36	2	24.3	1219.58	1118.53	1017.49	930.453	516.28	369.212	465.73
LRG1	DLLLPQPDLR	595.344	2	20.6	961.57	848.486	735.402	638.35	510.291	424.747	368.205
LRG1	VAAGAFQGLR	500.284	2	17.8	900.493	829.455	758.418	701.397	630.36	483.291	355.233
MBL2	WLTFSLGK	480.276	2	17.2	773.465	660.381	559.333	412.265	325.233	387.236	280.17
MBL2	FQASVATPR	493.768	2	17.6	839.461	711.402	640.365	553.333	454.265	383.228	420.234
PLG	HSIFTPETNPR	654.832	2	22.4	1171.6	1084.57	971.482	824.414	723.366	497.271	586.303
PLG	FVTWIEGVMR	624.328	2	21.5	1001.51	900.464	714.384	601.3	472.258	415.236	501.259
PRG4	ITEVWGIPSPIDTVFTR	971.021	2	31.9	1498.79	1312.71	1142.61	633.359	433.243	799.434	571.808
PRG4	GLPNVVTSAISLPNIR	830.985	2	27.7	1180.69	1081.62	980.576	893.544	822.507	709.423	509.307
PROS1	IETISHEDLQR	450.901	3	19.3	894.43	670.339	619.306	554.785	504.261	447.719	404.203
PROS1	IQALSLCSDQQSHLEFR	681.338	3	28	964.962	900.932	865.414	808.872	765.356	708.814	628.798
SAA1	FFGHGAEDSLADQAANEWGR	729.995	3	29.9	1056.47	941.446	813.388	742.351	671.314	557.271	428.228
SAA1	SFFSFLGEAFDGAR	780.871	2	26.2	1179.57	1092.53	945.466	832.382	775.361	646.318	313.186
SERPINA1	LQHLENELTHDIITK	604.663	3	25.2	835.476	734.429	785.919	717.39	418.242	367.718	524.282
SERPINA1	LSITGTYDLK	559.813	2	19.6	1005.53	918.502	805.418	704.37	647.349	546.301	383.238
SERPINA1	SVLGQLGITK	512.318	2	18.2	837.528	724.444	667.423	539.364	426.28	369.259	419.268
SERPINA3	ITLLSALVETR	613.373	2	21.2	1011.61	898.523	785.439	698.407	627.37	514.286	415.217
SERPINA3	EIGELYLPK	535.305	2	18.8	726.438	613.354	526.322	413.238	363.723	307.181	263.665
SERPINA3	EQLSLLDR	492.273	2	17.5	827.475	770.454	641.411	528.327	365.264	414.241	321.209
SERPINC1	EVPLNTIIFMGR	700.386	2	23.8	1171.65	961.516	847.473	746.426	633.342	520.258	586.33
SERPINC1	ANRPFLVFIR	414.916	3	17.9	657.432	544.348	445.28	586.352	529.331	272.678	391.237
SERPINF1	ELLDTVTAPQK	611.842	2	21.1	980.55	867.466	752.439	651.392	552.323	451.275	380.238
SERPINF1	TVQAVLTVPK	532.334	2	18.8	863.544	735.485	664.448	565.38	452.296	351.248	432.276
SERPING1	GVTSVSQIFHSPDLAIR	613	3	25.4	1178.66	1065.57	918.503	781.444	694.412	482.332	697.377
SERPING1	TNLESILSYPK	636.85	2	21.9	1057.6	944.518	815.475	728.443	615.359	502.275	415.243
C1QA	DQPRPAFSAIR	423.231	3	18.2	771.439	603.349	456.28	369.248	512.8	464.274	386.223
C1QA	SLGFCDTTNK	575.768	2	20.1	950.413	893.391	746.323	586.292	471.265	370.218	373.665
CFI	VFSLQWGEVK	600.829	2	20.8	1101.58	954.513	867.481	754.397	626.339	440.259	383.238
CFI	AQLGDLPWQVAIK	723.913	2	24.5	1247.72	1134.64	962.591	849.507	438.317	339.248	425.257
IGF2	SCDLALLETYCATPAK	910.936	2	30.1	1345.69	1274.65	1161.57	1048.49	919.443	424.265	323.217
IGF2	GIVEECCFR	590.262	2	20.5	1009.41	910.342	781.3	652.257	492.226	505.209	326.632

## Sheet: Supply_Table 3
Supplemental Table 3. List of peptides with good linearity and reproducibility across three LC gradients
Gene symbol	Peptide Sequence	Fragment			L/H Ratio of 100% endogenous (72 min)	L/H Ratio of 100% endogenous (35 min)	L/H Ratio of 100% endogenous (29 min)	% of endogenous dilution (72 min )$	% of endogenous dilution (35 min )$	% of endogenous dilution (29 min )$	CV* of 72 min	CV* of 35 min	CV* of 29 min
APOB	SVSDGIAALDLNAVANK	1107.62	1036.59	965.551	1.0833	1.09369	1.19817	0.1	0.02	0.02					$ Determination by response factor
APOB	SVSLPSLDPASAK	893.482	481.286	447.245	0.7305	0.768202	0.764633	0.02	0.02	0.02					* CV of quantifier peptides
APOB	GFEPTLEALFGK	983.565	672.381	492.286	0.599	0.619279	0.595088	0.1	0.1	0.05	0.0859883	0.0574451	0.0524407
AGT	DPTFIPAPIQAK	845.533	732.449	564.36	0.6797	0.675662	0.68997	0.02	0.01	0.02	0.087052	0.0721926	0.0667914
AGT	LQAILGVPWK	891.554	707.433	438.259	0.1051	0.106206	0.109014	0.02	0.02	0.1
APOE	LQAEAFQAR	802.408	731.371	602.328	1.0548	1.08028	1.0722	0.02	0.01	0.005
APOE	LAVYQAGAR	774.413	675.345	512.281	0.6245	0.631355	0.598555	0.02	0.02	0.02	0.0501779	0.0493545	0.0560885
CD14	FPAIQNLALR	908.555	724.434	503.308	0.01	0.0116549	0.0122434	0.1	0.1	0.05	0.0598013	0.05951	0.0667488
CD14	LTVGAAQVPAQLLVGALR	1274.78	1146.72	1047.65	0.0355	0.036473	0.0327633	0.02	0.2	0.2
CRP	ESDTSYVSLK	704.407	454.312	355.243	0.3789	0.411987	0.364844	0.02	0.02	0.05	0.0876986	0.108924	0.0752653
CRP	RQDNEILIFWSK	801.475	688.391	575.307	0.1317	0.125657	0.152533	0.1	0.1	1
IGFBP3	YGQPLPGYTTK	884.497	674.36	357.222	0.1256	0.126015	0.135929	0.02	0.02	0.05	0.101167	0.0546205	0.0485165
IGFBP3	CQPSPDEARPLQALLDGR	872.964	824.438	780.922	0.1437	0.136749	0.151425	0.01	0.02	0.2
LBP	ITLPDFTGDLR	930.455	522.273	465.731	0.1237	0.120208	0.124057	0.1	1	0.02
LBP	SFRPFVPR	381.248	464.773	391.239	0.1032	0.0954993	0.0999225	0.05	0.1	0.05	0.0476631	0.0337543	0.0338235
LPA	LFLEPTQADIALLK	1206.68	1077.64	539.323	0.0223	0.0209228	0.0230059	0.1	0.1	1
LPA	TPENYPNAGLTR	1015.52	901.477	738.413	0.049	0.0509643	0.0517908	0.05	0.005	0.1	0.08737	0.0573369	0.0697542
LPA	GSFSTTVTGR	731.392	644.36	543.312	0.0818	0.0827146	0.141342	1	0.05	0.2
PON1	IFFYDSENPPASEVLR	992.54	878.497	781.444	0.483	0.476853	0.484749	0.1	0.02	0.02
PON1	IQNILTEEPK	951.524	724.397	611.313	0.9955	1.00168	0.995342	0.01	0.05	0.02
PON1	EVQPVELPNCNLVK	1290.7	852.449	645.852	0.673	0.695469	0.667258	0.01	0.01	0.01	0.125766	0.0730422	0.0520673
RBP4	LIVHNGYCDGR	517.206	600.776	544.234	1.2416	3.34226	0.00529299	0.05	0.02	1	0.0594801	0.0711126	0.0461793
RBP4	YWGVASFLQK	857.497	701.407	630.37	0.8357	0.85081	0.830391	0.1	0.1	0.05
SHBG	IALGGLLFPASNLR	927.529	814.445	667.376	0.027	0.0275707	0.0264147	0.02	0.02	1	0.0423027	0.0437629	0.053774
SHBG	QAEISASAPTSLR	899.482	741.413	583.344	0.365	0.363944	0.297393	0.2	1	0.2
VWF	EGGPSQIGDALGFAVR	1028.58	915.492	559.323	0.0421	0.0382466	0.0500003	0.1	0.1	1	0.0737621	0.0567727	0.042042
VWF	ILAGPAGDSNVVK	1022.54	951.499	447.742	0.0321	0.0312789	0.0320158	0.02	0.02	0.1
VWF	YAGSQVASTSEVLK	941.539	842.471	771.434	0.155	0.17883	0.15212	0.1	1	1
APOA4	LVPFATELHER	865.44	433.224	370.525	0.3756	0.376559	0.356283	0.01	0.01	0.05	0.0895168	0.101264	0.0588201
APOA4	SLAPYAQDTQEK	1087.51	579.779	544.261	2.0861	2.19914	2.22936	0.02	0.05	0.05
APOA4	ISASAEELR	872.435	785.403	714.366	1.6805	1.71977	1.76709	0.05	0.01	0.02
APOL1	VTEPISAESGEQVER	1311.64	1101.5	656.324	2.3727	2.3134	2.65268	0.01	0.05	0.02
APOL1	LNILNNNYK	886.487	773.403	660.319	0.4205	0.390366	0.44934	0.02	0.005	0.05	0.122902	0.0879955	0.0318622
ATRN	YGHSLALYK	502.312	431.274	448.758	0.1254	0.107802	0.123451	0.05	0.2	0.1
ATRN	SVNNVVVR	710.418	482.332	383.264	0.0098	0.0110412	0.00969441	0.1	0.1	0.05	0.0834634	0.0655057	0.0777305
APOM	WIYHLTEGSTDLR	787.382	658.339	298.211	0.363	0.343967	0.349503	0.02	0.1	0.2	0.105087	0.0694341	0.0621989
APOM	SLTSCLDSK	717.333	630.301	357.186	0.5082	0.523398	0.493254	0.01	0.05	0.05
APOA2	SPELQAEAK	796.429	667.386	447.245	1.199	1.22976	1.33297	0.02	0.05	0.05	0.0878907	0.0568287	0.0673826
APOA2	EQLTPLIK	692.48	579.396	478.348	6.7122	6.89198	6.55427	0.005	0.01	0.01
APOC3	DYWSTVK	628.354	442.275	355.243	3.6407	3.65723	3.59661	0.01	0.01	0.005	0.087323	0.0624608	0.079972
APOC3	DALSSVQESQVAQQAR	682.387	512.281	384.223	28.231	31.6765	30.9477	0.05	0.02	0.005
APOH	TFYEPGEEITYSCKPGYVSR	688.365	926.942	618.297	10.3403	10.4993	11.271	0.005	0.01	0.005
APOH	TCPKPDDLPFSTVVPLK	995.602	751.48	498.304	3.6093	3.87934	3.69906	0.005	0.02	0.02	0.123336	0.129316	0.108835
AHSG	HTLNQIDEVK	1067.58	966.535	853.451	5.3313	5.05015	5.41273	0.02	0.005	0.01	0.0742889	0.0553212	0.0510496
AHSG	FSVVYAK	674.396	587.364	488.296	2.3939	2.50744	2.40397	0.1	0.01	0.01
APOD	MTVTDQVNCPK	1068.52	969.455	868.407	1.1478	1.14399	1.08655	0.02	0.02	0.01
APOD	IPTTFENGR	834.398	733.35	466.229	2.029	1.99211	2.08401	0.01	0.005	0.05
APOD	NILTSNNIDVK	1011.56	898.472	797.424	1.0283	1.03945	1.0658	0.02	0.02	0.01	0.0608289	0.0615262	0.0656337
AZGP1	EIPAWVPFDPAAQITK	1194.66	1095.59	736.444	0.909	0.88072	0.91131	0.1	0.005	0.02
AZGP1	IDVHWTR	472.254	354.694	305.16	0.6364	0.652957	0.665364	0.01	0.01	0.01
AZGP1	WEAEPVYVQR	971.518	900.481	771.439	0.2171	0.214776	0.2182	0.02	0.01	0.05	0.120436	0.0743424	0.0523051
CP	LISVDTEHSNIYLQNGPDR	696.33	568.271	977.96	3.5016	3.50844	3.75806	0.1	0.02	0.1
CP	ALYLQYTDETFR	1069.48	941.424	778.361	2.88	2.99304	3.35906	0.1	0.01	0.1	0.0950245	0.0414706	0.0682051
F10	TGIVSGFGR	632.339	533.271	446.239	0.2145	0.210449	0.215972	0.02	0.005	0.01	0.0921042	0.0794841	0.108625
F10	ETYDFDIAVLR	843.496	696.428	468.317	0.0158	0.0184895	0.0168009	0.1	0.1	0.1
F2	ELLESYIDGR	962.482	849.398	720.355	3.5527	3.23074	3.54855	0.02	0.005	0.02	0.0706752	0.0469934	0.0617249
F2	GQPSVLQVVNLPIVERPVCK	1105.63	1028.1	716.415	3.5241	3.58972	3.74772	0.005	0.005	0.02
FGB	AHYGGFTVQNEANK	711.351	583.293	340.207	33.9453	34.8764	33.5523	0.02	0.002	0.02	0.0784672	0.0977661	0.0786788
FGB	EDGGGWWYNR	1005.46	648.313	462.233	44.1632	43.9693	44.1031	0.01	0.01	0.01
FGB	EEAPSLRPAPPPISGGGYR	606.287	851.967	816.448	11.0409	10.673	11.2377	0.01	0.002	0.01
HP	YVMLPVADQDQCIR	1211.57	1015.45	606.289	107.004	115.021	109.947	0.02	0.02	0.005	0.0584435	0.0675079	0.0719067
HP	SPVGVQPILNEHTFCAGMSK	948.963	806.889	698.351	83.8376	86.056	82.0107	0.01	0.02	0.005
LCAT	SSGLVSNAPGVQIR	951.525	679.413	426.27	0.0935	0.0952764	0.0977991	0.005	0.02	0.05
LCAT	STELCGLWQGR	886.423	726.392	556.287	0.1131	0.113889	0.116685	0.01	0.02	0.1	0.0956961	0.0711338	0.055043
LCAT	ITTTSPWMFPSR	1219.58	930.453	369.212	0.1038	0.103593	0.0897989	0.02	0.2	1
LRG1	DLLLPQPDLR	848.486	735.402	368.205	0.5847	0.59909	0.550825	0.02	0.01	0.02
LRG1	VAAGAFQGLR	829.455	758.418	630.36	0.6584	0.66748	0.66491	0.02	0.01	0.01	0.0766422	0.0713856	0.0619935
MBL2	WLTFSLGK	773.465	660.381	559.333	0.0252	0.0273697	0.0263576	0.2	0.2	0.2
MBL2	FQASVATPR	711.402	640.365	454.265	0.0467	0.0502564	0.0458662	0.1	0.1	0.1	0.127982	0.0609013	0.0703205
PLG	HSIFTPETNPR	1084.57	971.482	723.366	1.295	1.24387	1.18971	0.01	0.01	0.02	0.0976073	0.0739053	0.0585784
PLG	FVTWIEGVMR	1001.51	714.384	601.3	3.5924	3.62992	3.60321	0.1	0.005	0.1
PRG4	ITEVWGIPSPIDTVFTR	1498.79	1312.71	1142.61	0.051	0.0502807	0.052773	0.2	0.2	0.2
PRG4	GLPNVVTSAISLPNIR	1180.69	1081.62	509.307	0.4805	0.433211	0.384945	0.1	0.05	1	0.0697562	0.100002	0.0495378
PROS1	IETISHEDLQR	619.306	554.785	447.719	0.4435	0.45214	0.454326	0.05	0.01	0.1	0.0484669	0.0574498	0.05062
PROS1	IQALSLCSDQQSHLEFR	900.932	808.872	708.814	0.4069	0.382245	0.371505	0.02	0.1	0.2
SAA1	FFGHGAEDSLADQAANEWGR	742.351	671.314	428.228	0.299	0.318962	0.305975	0.1	0.05	0.05
SAA1	SFFSFLGEAFDGAR	945.466	832.382	313.186	0.5851	0.597733	0.59815	0.1	0.05	0.1	0.11303	0.0888077	0.0413007
SERPINA1	LQHLENELTHDIITK	835.476	785.919	524.282	21.2127	22.2977	22.4763	0.02	0.005	0.01	0.0854412	0.0600064	0.0926754
SERPINA1	LSITGTYDLK	918.502	805.418	704.37	32.9942	32.4333	32.954	0.1	0.1	0.1
SERPINA1	SVLGQLGITK	837.528	724.444	419.268	33.5109	30.6196	30.9164	0.02	0.02	0.02
SERPINA3	ITLLSALVETR	1011.61	898.523	785.439	10.1928	9.95855	10.8554	0.1	0.1	0.1
SERPINA3	EIGELYLPK	827.475	641.411	365.264	4.6368	4.64515	4.52916	0.01	0.005	0.002	0.0817743	0.0752959	0.0689987
SERPINA3	EQLSLLDR	726.438	613.354	413.238	5.203	5.081	5.11469	0.01	0.02	0.005
SERPINC1	EVPLNTIIFMGR	1171.65	961.516	633.342	5.2284	5.44696	5.27287	0.1	0.02	0.005
SERPINC1	ANRPFLVFIR	544.348	445.28	586.31	3.1009	2.95113	3.1389	0.01	0.02	0.005	0.107564	0.0620745	0.0294875
SERPINF1	ELLDTVTAPQK	867.466	552.323	380.238	0.8634	0.930017	0.911043	0.05	0.02	0.02
SERPINF1	TVQAVLTVPK	863.544	735.485	565.38	0.593	0.633797	0.601541	0.01	0.05	0.02	0.0871215	0.0666972	0.0415968
SERPING1	GVTSVSQIFHSPDLAIR	781.444	694.412	697.377	4.6717	4.47617	4.37769	0.02	0.02	0.05
SERPING1	TNLESILSYPK	1057.6	944.518	815.475	9.4733	9.90526	9.32384	0.02	0.02	0.02	0.0574513	0.109765	0.0504682
C1QA	DQPRPAFSAIR	771.439	456.28	512.8	1.8083	1.82377	1.77658	0.02	0.01	0.01	0.0779665	0.0861436	0.0655322
C1QA	SLGFCDTTNK	950.413	893.391	746.323	2.7827	2.80053	2.91253	0.1	0.05	0.05
CFI	VFSLQWGEVK	954.513	754.397	626.339	0.5014	0.499939	0.469442	0.02	0.005	0.2	0.101926	0.0336043	0.0138073
CFI	AQLGDLPWQVAIK	1247.72	962.591	849.507	0.8345	0.794345	0.824522	0.02	0.2	0.02
IGF2	SCDLALLETYCATPAK	1274.65	1161.57	1048.49	0.1002	0.104653	0.101332	0.02	0.1	1
IGF2	GIVEECCFR	1009.41	910.342	781.3	0.0734	0.0714634	0.0682394	0.1	0.1	0.2	0.0799868	0.0625892	0.123749

## Sheet: Supply_Table 4
Supplemental Table 4. Repeatibility test of 95 surrogated peptides
Gene symbol	Peptide Sequence	Lowest ratio of detection	Ratio of individual Sample 1	Ratio of individual Sample 2	Ratio of individual Sample 3	Ratio of individual Sample 4	Ratio of individual Sample 5	Ratio of individual Sample 6
APOB	SVSDGIAALDLNAVANK	0.0218738	1.2191	1.77655	1.14047	1.7018	1.19453	1.7971
APOB	SVSLPSLDPASAK	0.015364	0.7714	1.08645	0.743567	1.03077	0.434267	1.09663
APOB	GFEPTLEALFGK	0.0619279	0.6309	0.90865	0.623333	0.906367	0.672333	0.959667
AGT	DPTFIPAPIQAK	0.00675662	1.17255	0.86165	0.7404	1.12857	0.934667	1.2117
AGT	LQAILGVPWK	0.00212413	1.1064	0.85785	0.750167	1.0331	0.955667	0.9416
APOE	LQAEAFQAR	0.0108028	0.33675	0.86135	0.561567	0.621333	0.501133	1.16457
APOE	LAVYQAGAR	0.0126271	0.03505	0.0778	0.0397	0.0415333	0.0354333	0.1484
CD14	FPAIQNLALR	0.00116549	0.00415	0.01045	0.00676667	0.00646667	0.00636667	0.00936667
CD14	LTVGAAQVPAQLLVGALR	0.0072946	0.04025	0.06045	0.0441333	0.0389333	0.0354667	0.0559333
CRP	ESDTSYVSLK	0.00823975	0.0102	1.8944	1.33563	0.693867	0.906867	0.0339333
CRP	RQDNEILIFWSK	0.0125657	0.0023	0.1977	0.0527667	0.0326667	0.0489333	0.00503333
IGFBP3	YGQPLPGYTTK	0.00252031	0.14465	0.1508	0.136	0.131467	0.1343	0.231033
IGFBP3	CQPSPDEARPLQALLDGR	0.00273498	0.04865	0.0729	0.0498333	0.0533333	0.0540667	0.1035
LBP	ITLPDFTGDLR	0.120208	0.091	0.26785	0.1961	0.0903333	0.147433	0.0910333
LBP	SFRPFVPR	0.00954993	0.02995	0.09165	0.0671667	0.0281333	0.0485667	0.036
LPA	LFLEPTQADIALLK	0.00209228	0.01055	0.00105	0.000833333	0.0169	0.000933333	0.163733
LPA	TPENYPNAGLTR	0.000254822	0.01755	0.0069	0.00516667	0.0314	0.00486667	0.3192
LPA	GSFSTTVTGR	0.00413573	0.0155	0.00275	0.0014	0.0416	0.0066	0.395267
PON1	IFFYDSENPPASEVLR	0.00953706	0.88965	0.47935	0.5674	0.983033	0.4985	0.922033
PON1	IQNILTEEPK	0.0500838	1.5529	0.86695	0.9484	1.6016	0.8087	1.62097
PON1	EVQPVELPNCNLVK	0.00695469	1.1287	0.62485	0.731567	1.27	0.624067	1.1728
RBP4	LIVHNGYCDGR	0.0668452	2.2144	2.0887	2.08737	1.98297	2.71833	2.90337
RBP4	YWGVASFLQK	0.085081	0.7053	0.76175	0.7374	0.678667	0.884733	0.982133
SHBG	IALGGLLFPASNLR	0.000551414	0.018	0.01645	0.0096	0.0165	0.0044	0.0463
SHBG	QAEISASAPTSLR	0.363944	0.6055	0.4437	0.328067	0.510967	0.172833	1.2297
VWF	EGGPSQIGDALGFAVR	0.00382466	0.00675	0.03325	0.0733667	0.0499667	0.0269333	0.0356333
VWF	ILAGPAGDSNVVK	0.000625579	0.0097	0.0431	0.103767	0.0709667	0.0372	0.0452333
VWF	YAGSQVASTSEVLK	0.17883	0.04305	0.20395	0.3933	0.301033	0.168333	0.202
APOA4	LVPFATELHER	0.00376559	0.01085	0.00765	0.0095	0.00206667	0.00613333	0.0310667
APOA4	SLAPYAQDTQEK	0.109957	4.445	2.12795	3.6173	1.22893	2.9448	5.7383
APOA4	ISASAEELR	0.0171977	5.29945	2.20915	4.35643	1.6725	4.23467	5.85947
APOL1	VTEPISAESGEQVER	0.11567	7.9461	5.92435	5.3854	4.06477	5.6524	6.4934
APOL1	LNILNNNYK	0.00195183	0.39895	0.2353	0.344133	0.00146667	0.3713	0.384967
ATRN	YGHSLALYK	0.0215603	0.05845	0.05345	0.0409333	0.0428	0.0323	0.0673667
ATRN	SVNNVVVR	0.00110412	0.0053	0.0038	0.0036	0.00183333	0.002	0.00136667
APOM	WIYHLTEGSTDLR	0.0343967	0.34275	0.42905	0.320767	0.2698	0.2805	0.4662
APOM	SLTSCLDSK	0.0261699	0.7023	0.73645	0.525833	0.522067	0.563867	0.937733
APOA2	SPELQAEAK	0.0614882	0.44025	0.70665	0.4118	0.2057	0.204467	0.1082
APOA2	EQLTPLIK	0.0689198	20.1943	17.5461	13.7349	23.5527	13.2875	19.1112
APOC3	DYWSTVK	0.0365723	2.98355	4.3213	12.5096	5.0108	5.3432	6.85137
APOC3	DALSSVQESQVAQQAR	0.63353	42.67	57.8566	155.83	77.7778	59.9841	91.8068
APOH	TFYEPGEEITYSCKPGYVSR	0.104993	6.60375	6.48725	7.6924	5.69933	7.0148	7.62177
APOH	TCPKPDDLPFSTVVPLK	0.0775867	4.9394	4.50655	5.35757	4.3507	5.27207	4.79203
AHSG	HTLNQIDEVK	0.0252507	5.48665	2.25425	2.86387	3.13423	3.3633	6.61003
AHSG	FSVVYAK	0.0250744	0.1376	0.0706	0.101633	0.0579667	0.0733	0.272367
APOD	MTVTDQVNCPK	0.0228798	5.2393	2.83365	2.28507	4.26117	2.82103	3.54697
APOD	IPTTFENGR	0.00996056	0.19785	0.64425	0.418933	0.819	0.6281	0.507367
APOD	NILTSNNIDVK	0.020789	0.8942	0.6319	0.5618	0.8121	0.5175	0.799833
AZGP1	EIPAWVPFDPAAQITK	0.0044036	1.1656	1.3078	1.36227	0.972433	1.3768	1.3536
AZGP1	IDVHWTR	0.00652957	0.6199	0.7119	0.6781	0.424367	0.664667	1.05343
AZGP1	WEAEPVYVQR	0.00214776	0.8749	0.96435	1.03533	0.747767	1.052	0.990567
CP	LISVDTEHSNIYLQNGPDR	0.0701687	4.70785	8.5426	6.35613	6.14377	5.47443	6.31127
CP	ALYLQYTDETFR	0.0299304	5.14615	9.2693	6.68403	6.82403	3.86057	9.3858
F10	TGIVSGFGR	0.00105225	0.2077	0.182	0.219667	0.1566	0.164367	0.180467
F10	ETYDFDIAVLR	0.00184895	0.02275	0.0192	0.0185333	0.0162333	0.0183333	0.0194667
F2	ELLESYIDGR	0.0161537	4.2499	6.3022	5.5743	5.69933	4.69927	5.07913
F2	GQPSVLQVVNLPIVERPVCK	0.0179486	2.85695	4.235	3.60463	3.82127	3.09273	3.50667
FGB	AHYGGFTVQNEANK	0.0697529	5.9649	32.0673	65.2369	31.4541	24.6657	29.5379
FGB	EDGGGWWYNR	0.439693	7.88145	44.0953	87.5591	43.4693	33.2472	40.0787
FGB	EEAPSLRPAPPPISGGGYR	0.0213459	0.43605	4.02615	8.70957	3.62587	2.73633	3.98403
HP	YVMLPVADQDQCIR	2.30042	67.8671	133.464	285.632	161.292	141.417	85.7189
HP	SPVGVQPILNEHTFCAGMSK	1.72112	22.9258	51.0366	85.4728	53.1922	47.3394	31.6809
LCAT	SSGLVSNAPGVQIR	0.00190553	0.1026	0.12745	0.132733	0.1353	0.0977667	0.1369
LCAT	STELCGLWQGR	0.00227779	0.11115	0.14595	0.134367	0.142033	0.1037	0.147233
LCAT	ITTTSPWMFPSR	0.0207186	0.07175	0.0857	0.0837667	0.0882	0.0555333	0.0827333
LRG1	DLLLPQPDLR	0.0059909	0.45065	1.11885	1.1956	0.570567	0.9692	1.05353
LRG1	VAAGAFQGLR	0.0066748	0.122	0.52495	0.4801	0.227533	0.404633	0.456
MBL2	WLTFSLGK	0.00547394	0.0432	0.0162	0.0159	0.00166667	0.0137333	0.00676667
MBL2	FQASVATPR	0.00502564	0.23355	0.0707	0.0670667	0.00913333	0.0819667	0.0292333
PLG	HSIFTPETNPR	0.0124387	1.52905	2.0539	2.3379	1.47367	1.55413	1.54547
PLG	FVTWIEGVMR	0.0181496	2.754	3.9431	3.72367	2.38283	2.68253	2.6298
PRG4	ITEVWGIPSPIDTVFTR	0.0100561	0.0277	0.0726	0.0634667	0.0881333	0.0523333	0.0351333
PRG4	GLPNVVTSAISLPNIR	0.0216606	0.0944	0.2407	0.192433	0.233833	0.146633	0.1373
PROS1	IETISHEDLQR	0.0045214	0.89245	1.2102	1.44143	1.21033	0.867267	0.901933
PROS1	IQALSLCSDQQSHLEFR	0.0382245	0.025	0.0406	0.0339	0.0192333	0.0141	0.0453333
SAA1	FFGHGAEDSLADQAANEWGR	0.0159481	0.03175	0.8968	4.4299	0.775767	0.622333	0.249333
SAA1	SFFSFLGEAFDGAR	0.0298867	0.0253	1.1547	5.177	0.855667	0.820867	0.3062
SERPINA1	LQHLENELTHDIITK	0.111489	34.5918	36.4512	19.9907	32.4599	29.3091	30.7119
SERPINA1	LSITGTYDLK	3.24333	37.4774	39.8802	38.7402	34.1391	31.386	33.6349
SERPINA1	SVLGQLGITK	0.612392	39.9119	41.8606	41.588	36.7965	34.5027	35.7314
SERPINA3	ITLLSALVETR	0.995855	4.55235	7.81945	5.4941	3.6198	4.90837	6.31273
SERPINA3	EIGELYLPK	0.0232257	5.1819	8.35335	9.0578	5.5013	5.89017	5.76887
SERPINA3	EQLSLLDR	0.10162	5.5412	9.2047	8.94887	5.6109	6.28477	6.25263
SERPINC1	EVPLNTIIFMGR	0.108939	3.6493	3.6531	2.4509	3.47253	2.82567	3.7578
SERPINC1	ANRPFLVFIR	0.0590227	0.7376	0.61595	0.436167	0.585867	0.660933	0.943367
SERPINF1	ELLDTVTAPQK	0.0186003	1.11325	1.2633	1.70917	1.04343	1.5347	0.6828
SERPINF1	TVQAVLTVPK	0.0316898	0.57945	0.64835	0.657467	0.419	0.682967	0.402733
SERPING1	GVTSVSQIFHSPDLAIR	0.0895234	5.763	6.2905	5.86697	4.5489	3.9094	5.52737
SERPING1	TNLESILSYPK	0.198105	13.9803	16.0812	14.2767	10.9918	9.54273	13.0743
C1QA	DQPRPAFSAIR	0.0182377	0.2219	0.1886	0.1831	0.0741333	0.115633	0.264533
C1QA	SLGFCDTTNK	0.140027	4.35935	5.3407	3.733	3.96727	5.3914	4.57663
CFI	VFSLQWGEVK	0.00249969	0.30475	0.6195	0.655233	0.453167	0.415667	0.3767
CFI	AQLGDLPWQVAIK	0.158869	0.75795	1.513	1.70003	1.1305	1.175	0.932033
IGF2	SCDLALLETYCATPAK	0.0104653	0.02715	0.0405	0.0233	0.0191333	0.0230667	0.0554
IGF2	GIVEECCFR	0.00714634	0.04495	0.0696	0.0415667	0.0433667	0.0450667	0.0826

## Sheet: Supply_Table 5
Supplemental Table 5. Imprecision test of 95 surrogated peptides
Gene symbol	Peptide Sequence	Mean of CV intra (%)	Mean of CV inter (%)	CV Total (%)
APOB	SVSDGIAALDLNAVANK	6.73145	11.1166	11.1166
APOB	SVSLPSLDPASAK	7.06286	10.6669	10.6669
APOB	GFEPTLEALFGK	4.63998	8.78632	8.78632
AGT	DPTFIPAPIQAK	4.41525	10.9578	10.9578
AGT	LQAILGVPWK	3.72366	15.0314	15.0314
APOE	LQAEAFQAR	9.72282	14.3297	14.3297
APOE	LAVYQAGAR	3.98265	10.6886	10.6886
CD14	FPAIQNLALR	5.99995	12.6921	12.6921
CD14	LTVGAAQVPAQLLVGALR	7.58148	13.449	13.449
CRP	ESDTSYVSLK	0.975046	12.6456	12.6456
CRP	RQDNEILIFWSK	8.84853	15.0847	17.4884
IGFBP3	YGQPLPGYTTK	6.31154	12.3242	12.3242
IGFBP3	CQPSPDEARPLQALLDGR	5.46664	13.0906	13.0906
LBP	ITLPDFTGDLR	6.28874	11.7521	11.7521
LBP	SFRPFVPR	10.6662	14.1907	14.1907
LPA	LFLEPTQADIALLK	10.1276	13.2575	16.6832
LPA	TPENYPNAGLTR	6.29762	6.65092	6.65092
LPA	GSFSTTVTGR	16.3077	22.7128	27.9609
PON1	IFFYDSENPPASEVLR	4.2304	10.4223	10.4223
PON1	IQNILTEEPK	4.21125	9.8704	9.8704
PON1	EVQPVELPNCNLVK	4.16354	11.8455	11.8455
RBP4	LIVHNGYCDGR	4.4361	10.527	10.527
RBP4	YWGVASFLQK	6.83453	12.8132	12.8132
SHBG	IALGGLLFPASNLR	9.67843	11.9634	11.9634
SHBG	QAEISASAPTSLR	13.329	19.5842	23.6897
VWF	EGGPSQIGDALGFAVR	7.87114	10.8356	10.8356
VWF	ILAGPAGDSNVVK	12.369	14.9424	14.9424
VWF	YAGSQVASTSEVLK	11.8829	14.6931	14.6931
APOA4	LVPFATELHER	6.88776	13.964	13.964
APOA4	SLAPYAQDTQEK	11.2344	16.3398	16.3398
APOA4	ISASAEELR	3.4897	10.5154	10.5154
APOL1	VTEPISAESGEQVER	5.92433	11.305	11.305
APOL1	LNILNNNYK	7.66696	12.8619	12.8619
ATRN	YGHSLALYK	9.38338	11.7357	11.7357
ATRN	SVNNVVVR	4.11152	10.9622	11.7079
APOM	WIYHLTEGSTDLR	9.03555	13.429	13.429
APOM	SLTSCLDSK	9.52377	14.6524	14.6524
APOA2	SPELQAEAK	3.66805	9.69105	9.69105
APOA2	EQLTPLIK	3.80821	11.3147	11.3147
APOC3	DYWSTVK	1.3847	11.5364	11.5364
APOC3	DALSSVQESQVAQQAR	7.01632	13.2371	13.2371
APOH	TFYEPGEEITYSCKPGYVSR	4.56228	9.01548	9.01548
APOH	TCPKPDDLPFSTVVPLK	3.53547	9.22585	9.22585
AHSG	HTLNQIDEVK	3.67866	8.65637	8.65637
AHSG	FSVVYAK	18.3013	23.6064	29.8697
APOD	MTVTDQVNCPK	7.77507	15.9706	15.9706
APOD	IPTTFENGR	4.13783	10.7659	10.7659
APOD	NILTSNNIDVK	5.44664	9.74986	9.74986
AZGP1	EIPAWVPFDPAAQITK	8.22096	11.5291	11.5291
AZGP1	IDVHWTR	6.21487	10.4738	10.4738
AZGP1	WEAEPVYVQR	4.10534	11.8021	11.8021
CP	LISVDTEHSNIYLQNGPDR	5.18022	11.2849	11.2849
CP	ALYLQYTDETFR	7.04392	18.2373	18.2373
F10	TGIVSGFGR	11.1809	16.1934	16.1934
F10	ETYDFDIAVLR	4.249	10.5334	10.5334
F2	ELLESYIDGR	6.62593	10.8362	10.8362
F2	GQPSVLQVVNLPIVERPVCK	8.69335	13.1966	13.1966
FGB	AHYGGFTVQNEANK	6.39658	11.1839	11.1839
FGB	EDGGGWWYNR	4.74145	11.8085	11.8085
FGB	EEAPSLRPAPPPISGGGYR	3.92209	8.55649	8.55649
HP	YVMLPVADQDQCIR	5.32288	16.076	16.076
HP	SPVGVQPILNEHTFCAGMSK	8.01081	15.2755	15.2755
LCAT	SSGLVSNAPGVQIR	5.47932	10.7426	10.7426
LCAT	STELCGLWQGR	7.72482	11.9765	11.9765
LCAT	ITTTSPWMFPSR	6.24341	16.2127	16.2127
LRG1	DLLLPQPDLR	8.48603	7.85397	7.85397
LRG1	VAAGAFQGLR	9.76368	13.9128	13.9128
MBL2	WLTFSLGK	29.0516	35.4521	45.835
MBL2	FQASVATPR	6.79621	11.7767	11.7767
PLG	HSIFTPETNPR	4.00747	10.8029	10.8029
PLG	FVTWIEGVMR	3.78888	14.5126	14.5126
PRG4	ITEVWGIPSPIDTVFTR	4.94272	10.9637	12.0263
PRG4	GLPNVVTSAISLPNIR	8.38731	11.593	11.593
PROS1	IETISHEDLQR	3.43651	9.28336	9.28336
PROS1	IQALSLCSDQQSHLEFR	7.92598	15.2171	15.2171
SAA1	FFGHGAEDSLADQAANEWGR	6.82359	14.8197	14.8197
SAA1	SFFSFLGEAFDGAR	9.82818	13.411	13.411
SERPINA1	LQHLENELTHDIITK	6.55093	12.2144	12.2144
SERPINA1	LSITGTYDLK	8.04643	11.3563	11.3563
SERPINA1	SVLGQLGITK	9.2497	14.5924	14.5924
SERPINA3	ITLLSALVETR	8.47799	14.4362	14.4362
SERPINA3	EIGELYLPK	11.2714	14.1319	14.1319
SERPINA3	EQLSLLDR	4.91045	10.8365	10.8365
SERPINC1	EVPLNTIIFMGR	5.91905	13.8092	13.8092
SERPINC1	ANRPFLVFIR	3.23196	8.05918	8.05918
SERPINF1	ELLDTVTAPQK	3.40798	12.0478	12.0478
SERPINF1	TVQAVLTVPK	7.7033	14.8885	14.8885
SERPING1	GVTSVSQIFHSPDLAIR	7.47414	12.9527	12.9527
SERPING1	TNLESILSYPK	5.05684	9.42269	9.42269
C1QA	DQPRPAFSAIR	6.10505	12.0175	12.0175
C1QA	SLGFCDTTNK	14.1645	21.386	21.386
CFI	VFSLQWGEVK	3.87005	10.671	10.671
CFI	AQLGDLPWQVAIK	7.29717	10.5401	10.5401
IGF2	SCDLALLETYCATPAK	10.06	14.7018	14.7018
IGF2	GIVEECCFR	9.66258	17.4345	17.4345

## Sheet: Supply_Table 6
Supplemental Table 6. Pre-extraction and postextraction stability assessment of surogate peptides
		Pre-extraction							Post-extraction
Protein	Peptide Sequence	40C_0h	40C_24h	40C_48h	1 freeze-thaw cycle	2 freeze-thaw cycle	4 weeks storage	Average	40C_0h	40C_24h	40C_48h	1 freeze-thaw cycle	2 freeze-thaw cycle	4 weeks storage	Average
APOB	GFEPTLEALFGK	0.0325001	0.0322184	0.0180543	0.0162411	0.0262101	0.0590037	0.0307046	0.0719491	0.090535	0.0659768	0.023768	0.13373	0.126712	0.085445
AGT	DPTFIPAPIQAK	0.0159317	0.00600515	0.0136679	0.0157008	0.0210761	0.00823628	0.0134363	0.0471145	0.0849335	0.0526297	0.0276208	0.159164	0.179939	0.0919002
APOE	LAVYQAGAR	0.0198064	0.0124219	0.00594435	0.00808029	0.0105228	0.0136243	0.0117333	0.04	0.0729765	0.0740179	0.0555587	0.0384171	0.168294	0.0748774
CD14	FPAIQNLALR	0.0658505	0.0265885	0.0651282	0.0909413	0.0221393	0.0645466	0.0558657	0.060241	0.0325159	0.082366	0.065511	0.129821	0.152198	0.0871087
CRP	ESDTSYVSLK	0.0886545	0.0804574	0.114874	0.0562147	0.0442614	0.097004	0.0802443	0.0435322	0.0709431	0.085612	0.0451949	0.0729634	0.165812	0.0806763
IGFBP3	YGQPLPGYTTK	0.0494774	0.0503418	0.0496136	0.0213954	0.0307296	0.0437961	0.0408923	0.0380664	0.109476	0.0563871	0.0638623	0.0403891	0.204171	0.0853918
LBP	SFRPFVPR	0.0565849	0.025299	0.0405918	0.0134773	0.0242815	0.0188231	0.0298429	0.0675044	0.0390394	0.0871507	0.0499319	0.038662	0.175872	0.07636
LPA	TPENYPNAGLTR	0.108937	0.111428	0.0835068	0.0626199	0.0832642	0.0399298	0.0816143	0.0861376	0.0493733	0.0729971	0.0480276	0.0709557	0.161391	0.0814804
PON1	EVQPVELPNCNLVK	0.0208933	0.0194727	0.0080589	0.0275328	0.0221905	0.0271754	0.0208873	0.149372	0.157981	0.0303813	0.03809	0.248179	0.153798	0.129634
RBP4	LIVHNGYCDGR	0.0173408	0.0238328	0.0172176	0.0298107	0.0377549	0.0108885	0.0228075	0.0871498	0.0382193	0.020162	0.0292903	0.0782873	0.161385	0.0690824
SHBG	IALGGLLFPASNLR	0.0494159	0.0409735	0.0494159	0.0883478	0.0237688	0.068784	0.0534509	0.0775553	0.0864395	0.168511	0.0271836	0.109719	0.261321	0.121788
VWF	EGGPSQIGDALGFAVR	0.0619395	0.0463237	0.0395764	0.0989454	0.213054	0.0544711	0.0857183	0.081788	0.0977569	0.108457	0.0532162	0.106462	0.228351	0.112672
APOA4	LVPFATELHER	0.0160337	0.0216204	0.0122014	0.00646696	0.0187306	0.0151148	0.015028	0.0522313	0.0820053	0.0314946	0.0550314	0.0213908	0.165288	0.0679069
APOL1	LNILNNNYK	0.0255525	0.0148698	0.0179456	0.022929	0.0274898	0.0125892	0.0202293	0.090759	0.0794409	0.0861298	0.0339324	0.0360047	0.173602	0.0833114
ATRN	SVNNVVVR	0.0198152	0.0174339	0.0283459	0.0432989	0.026816	0.0441861	0.0299827	0.0872323	0.0473102	0.0422314	0.0452337	0.0469018	0.149823	0.0697887
APOM	WIYHLTEGSTDLR	0.0398039	0.0136652	0.0136905	0.0113784	0.0293284	0.0300804	0.0229911	0.207618	0.162575	0.104121	0.0625833	0.133656	0.197025	0.144596
APOA2	SPELQAEAK	0.01154	0.0112168	0.00924678	0.0103073	0.0093674	0.0185818	0.01171	0.028752	0.0406573	0.0344213	0.027241	0.0399054	0.135523	0.0510834
APOC3	DYWSTVK	0.0058836	0.0154942	0.0163458	0.00837544	0.0131881	0.00562722	0.0108191	0.058926	0.0584991	0.11399	0.0392275	0.120494	0.135412	0.087758
APOH	TCPKPDDLPFSTVVPLK	0.0180405	0.0228478	0.0187797	0.0220971	0.0191678	0.0283287	0.0215436	0.0392055	0.0610921	0.082038	0.0435346	0.0218152	0.174166	0.0703086
AHSG	HTLNQIDEVK	0.00990985	0.00901576	0.00958138	0.00632891	0.00893776	0.0104625	0.00903935	0.0413951	0.0435951	0.0410363	0.0419309	0.0594353	0.15922	0.0644354
APOD	NILTSNNIDVK	0.0116415	0.00790015	0.00679107	0.00857364	0.00586211	0.00833188	0.00818339	0.0441606	0.046698	0.0700092	0.0411607	0.0646553	0.168781	0.0725775
AZGP1	WEAEPVYVQR	0.0144624	0.0150823	0.0256931	0.012518	0.00651067	0.0261849	0.0167419	0.0467465	0.0292857	0.0989984	0.0453511	0.0228283	0.137547	0.0634596
CP	ALYLQYTDETFR	0.0190681	0.0193691	0.0156689	0.0127602	0.0195917	0.0153477	0.0169676	0.0431861	0.0166809	0.031681	0.0406537	0.0330969	0.00839543	0.028949
F10	TGIVSGFGR	0.0391453	0.0374921	0.0246791	0.0200871	0.0196566	0.0311816	0.028707	0.0361378	0.0570694	0.0794314	0.0251765	0.0386119	0.147099	0.063921
F2	ELLESYIDGR	0.0109956	0.00383861	0.0174828	0.00788751	0.0103636	0.0170925	0.0112768	0.109649	0.110941	0.17273	0.0239483	0.0621241	0.157691	0.106181
FGB	AHYGGFTVQNEANK	0.00249229	0.0166513	0.0093362	0.0112496	0.0134171	0.00848076	0.0102712	0.0246838	0.0236874	0.0501237	0.0116962	0.0237573	0.180689	0.0524395
HP	YVMLPVADQDQCIR	0.0283844	0.0269993	0.0263031	0.0209819	0.0230763	0.0210196	0.0244608	0.0581997	0.0543312	0.0306712	0.0244642	0.0231054	0.162849	0.0589367
LCAT	STELCGLWQGR	0.0314835	0.0260711	0.0366439	0.0349775	0.0350333	0.0438117	0.0346702	0.208587	0.237036	0.105142	0.052276	0.110478	0.183784	0.14955
LRG1	VAAGAFQGLR	0.0201634	0.0292548	0.0258968	0.0232801	0.01863	0.0264571	0.023947	0.0659476	0.0266851	0.0408216	0.0269244	0.0480077	0.180878	0.0648774
MBL2	FQASVATPR	0.0494261	0.0389582	0.0265775	0.0319368	0.0339813	0.0582684	0.039858	0.0644431	0.0472728	0.0375915	0.0256399	0.0454859	0.181911	0.0670574
PLG	HSIFTPETNPR	0.0301269	0.0221027	0.0118234	0.0328209	0.0224134	0.0430429	0.027055	0.0651693	0.0699634	0.0502479	0.0622901	0.0309338	0.171608	0.0750354
PRG4	GLPNVVTSAISLPNIR	0.0437317	0.0636316	0.0766602	0.0998308	0.0868717	0.083952	0.0757797	0.0607573	0.117152	0.120639	0.0100125	0.0973864	0.0995053	0.084242
PROS1	IETISHEDLQR	0.0236924	0.0126839	0.023465	0.0150861	0.0251983	0.0225394	0.0204442	0.0234016	0.0693746	0.0572737	0.0511842	0.0751486	0.145995	0.0703963
SAA1	SFFSFLGEAFDGAR	0.081164	0.0948353	0.0532212	0.0379455	0.0627832	0.034053	0.060667	0.0479936	0.0633226	0.0698314	0.0901791	0.0400905	0.164784	0.0793668
SERPINA1	LQHLENELTHDIITK	0.0240074	0.0143534	0.0181982	0.013465	0.0229811	0.00767226	0.0167796	0.0387626	0.0651695	0.0541913	0.0400809	0.0267105	0.19935	0.0707109
SERPINA3	EIGELYLPK	0.0307508	0.0169549	0.0108758	0.0129644	0.00692927	0.0238846	0.01706	0.0972424	0.0617652	0.214261	0.0326645	0.0943922	0.139445	0.106628
SERPINC1	ANRPFLVFIR	0.0200907	0.0123141	0.00766692	0.0114854	0.00994837	0.0139273	0.0125721	0.0780226	0.0610176	0.0359275	0.0400687	0.0724125	0.162027	0.0749127
SERPINF1	TVQAVLTVPK	0.0227037	0.0269193	0.0361116	0.0125222	0.0184384	0.0108118	0.0212512	0.0939724	0.117777	0.117224	0.0293924	0.0624338	0.255552	0.112725
SERPING1	TNLESILSYPK	0.0411387	0.0103719	0.0197525	0.0142677	0.00497642	0.0377481	0.0213759	0.0470892	0.0658645	0.0418307	0.0373573	0.126942	0.149739	0.0781372
C1QA	DQPRPAFSAIR	0.0188211	0.0157045	0.0125671	0.0182087	0.0142366	0.0109093	0.0150746	0.0438341	0.0871355	0.039194	0.0582625	0.0337157	0.141529	0.0672785
CFI	VFSLQWGEVK	0.0205311	0.0327792	0.0203924	0.0135515	0.0231526	0.0212198	0.0219378	0.104455	0.0975936	0.0277757	0.0575353	0.0818962	0.197435	0.0944484
IGF2	GIVEECCFR	0.0295331	0.0332064	0.0306813	0.0794668	0.0480579	0.0692632	0.0483681	0.034673	0.0610796	0.073929	0.0636647	0.0203104	0.113294	0.0611584

## Sheet: Supply_Table 7
Supplemental Table 7. Reproducibility test of 96-well plate sample preparation
Gene symbol	Peptide Sequence	Pool01	Pool02	Pool03	Pool04	Pool05	Pool06	Pool07	Pool08	Pool09	Pool10	Pool11	Pool12	Pool13	Pool14	Pool15	Pool16	Pool17	Pool18	CV
APOB	SVSDGIAALDLNAVANK	0.5236	0.421	0.4961	0.4137	0.4672	0.4535	0.5077	0.4497	0.4428	0.4158	0.4345	0.432	0.4246	0.4207	0.4093	0.442	0.4697	0.3936	0.079914
APOB	SVSLPSLDPASAK	0.2723	0.2216	0.2262	0.208	0.2344	0.2321	0.2418	0.2246	0.2217	0.2112	0.2151	0.2065	0.2192	0.218	0.2143	0.2623	0.2646	0.2074	0.0885621
APOB	GFEPTLEALFGK	0.2066	0.1635	0.167	0.1546	0.1724	0.1913	0.1839	0.1677	0.1631	0.1588	0.1642	0.1556	0.1716	0.1684	0.1575	0.1616	0.1829	0.1519	0.0837767
AGT	DPTFIPAPIQAK	0.2453	0.2015	0.2105	0.194	0.2147	0.2102	0.2173	0.2054	0.2017	0.1927	0.1931	0.19	0.1994	0.2037	0.1939	0.2104	0.2387	0.1821	0.0783696
AGT	LQAILGVPWK	0.0439	0.0366	0.0378	0.0326	0.0404	0.0383	0.0421	0.0328	0.0337	0.0313	0.0309	0.0323	0.0338	0.033	0.0333	0.0329	0.0428	0.0314	0.120361
APOE	LQAEAFQAR	0.4589	0.3784	0.4002	0.3613	0.4085	0.4043	0.4297	0.3811	0.3737	0.3574	0.3746	0.3537	0.3826	0.3659	0.3467	0.3972	0.4411	0.3254	0.0887127
APOE	LAVYQAGAR	0.4639	0.3688	0.4078	0.3631	0.3739	0.3843	0.4146	0.3822	0.3735	0.3628	0.3647	0.349	0.3761	0.3669	0.3653	0.4015	0.4371	0.3508	0.0793259
CD14	FPAIQNLALR	0.006	0.0055	0.0053	0.004	0.0053	0.0051	0.0049	0.0052	0.0043	0.0042	0.0045	0.0044	0.0046	0.0047	0.0045	0.0049	0.0052	0.0042	0.110777
CD14	LTVGAAQVPAQLLVGALR	0.0116	0.0094	0.0075	0.0085	0.0083	0.0103	0.0096	0.0091	0.0094	0.0089	0.0087	0.0082	0.0092	0.0086	0.0077	0.0088	0.0093	0.0098	0.105459
CRP	ESDTSYVSLK	0.0466	0.044	0.0422	0.0399	0.0387	0.0331	0.0419	0.0394	0.0367	0.0367	0.0379	0.0332	0.0304	0.0379	0.0372	0.0356	0.0347	0.0398	0.10601
CRP	RQDNEILIFWSK	0.0105	0.0068	0.0063	0.0073	0.0081	0.0079	0.0085	0.0072	0.0078	0.0064	0.0071	0.0066	0.0071	0.0053	0.0084	0.0076	0.0077	0.0081	0.148751
IGFBP3	YGQPLPGYTTK	0.0466	0.0378	0.0423	0.0425	0.0393	0.038	0.0431	0.0387	0.0392	0.0364	0.0363	0.0359	0.0357	0.036	0.0382	0.0429	0.0484	0.0362	0.0964772
IGFBP3	CQPSPDEARPLQALLDGR	0.0784	0.0656	0.0654	0.0626	0.0791	0.0782	0.0675	0.0643	0.0637	0.0604	0.0637	0.0575	0.0634	0.0654	0.0553	0.0789	0.0792	0.0602	0.118549
LBP	ITLPDFTGDLR	0.0325	0.0324	0.0229	0.0252	0.0237	0.0254	0.0304	0.0386	0.0242	0.0215	0.0233	0.0235	0.0228	0.0234	0.0226	0.0283	0.0255	0.0209	0.180827
LBP	SFRPFVPR	0.0225	0.022	0.0241	0.021	0.0193	0.0189	0.0244	0.0204	0.021	0.0168	0.018	0.0192	0.019	0.0175	0.0191	0.0223	0.0208	0.0179	0.10893
LPA	LFLEPTQADIALLK	0.0052	0.0044	0.0049	0.0041	0.0044	0.0051	0.0049	0.0046	0.0044	0.0042	0.0047	0.004	0.0045	0.0045	0.004	0.0049	0.0036	0.005	0.0961062
LPA	TPENYPNAGLTR	0.011	0.0086	0.0117	0.0073	0.0084	0.0092	0.0096	0.0088	0.0078	0.0089	0.008	0.0071	0.0089	0.0088	0.0092	0.0108	0.0092	0.008	0.136788
LPA	GSFSTTVTGR	0.0238	0.0215	0.0211	0.0167	0.0227	0.0226	0.0248	0.0225	0.022	0.0232	0.0199	0.0145	0.0242	0.0193	0.0197	0.0181	0.0317	0.0182	0.174832
PON1	IFFYDSENPPASEVLR	0.2306	0.1837	0.1927	0.1719	0.1877	0.1902	0.208	0.1925	0.1831	0.1768	0.174	0.168	0.1774	0.1822	0.1754	0.1984	0.2197	0.1659	0.0930951
PON1	IQNILTEEPK	0.4424	0.3891	0.4095	0.3717	0.3696	0.3967	0.4221	0.3834	0.3771	0.3505	0.3562	0.3456	0.3143	0.3562	0.3459	0.3676	0.4532	0.3367	0.0975325
PON1	EVQPVELPNCNLVK	0.3348	0.2756	0.2943	0.2471	0.2849	0.2885	0.2978	0.2909	0.2712	0.2434	0.2559	0.248	0.2684	0.2653	0.2731	0.2815	0.2901	0.2408	0.0857892
RBP4	LIVHNGYCDGR	1.4317	1.1867	1.3678	1.2073	1.252	1.2969	1.3162	1.2012	1.1551	1.1113	1.18	1.1408	1.1572	1.196	1.1772	1.3317	1.4197	1.1117	0.0819845
RBP4	YWGVASFLQK	0.2963	0.2399	0.2638	0.2403	0.2623	0.2521	0.2658	0.2411	0.2348	0.2302	0.2342	0.2218	0.2376	0.2362	0.232	0.2614	0.2913	0.2141	0.0896159
SHBG	IALGGLLFPASNLR	0.0102	0.0083	0.0085	0.0069	0.0083	0.0086	0.0094	0.0087	0.008	0.0076	0.0079	0.0083	0.0072	0.0078	0.0075	0.0087	0.0087	0.0077	0.0954931
SHBG	QAEISASAPTSLR	0.1913	0.1511	0.1447	0.1497	0.1932	0.1637	0.1738	0.1729	0.1654	0.1649	0.1647	0.1345	0.1306	0.1659	0.1494	0.18	0.1599	0.1446	0.108786
VWF	EGGPSQIGDALGFAVR	0.0155	0.0193	0.0174	0.0155	0.0176	0.0199	0.0143	0.0153	0.0182	0.0192	0.0192	0.0154	0.0171	0.0188	0.0137	0.0171	0.0183	0.0118	0.132682
VWF	ILAGPAGDSNVVK	0.029	0.0288	0.0132	0.018	0.0147	0.0174	0.026	0.0158	0.012	0.016	0.0161	0.0162	0.0149	0.0169	0.019	0.0119	0.0154	0.0171	0.288417
VWF	YAGSQVASTSEVLK	0.0532	0.0504	0.0568	0.058	0.0242	0.0313	0.055	0.0556	0.0558	0.0297	0.0188	0.0333	0.0225	0.025	0.0395	0.0496	0.0317	0.0356	0.342403
APOA4	LVPFATELHER	0.1773	0.1425	0.1515	0.1327	0.1493	0.1491	0.1541	0.1386	0.1396	0.1294	0.1325	0.1291	0.1345	0.1397	0.1336	0.1472	0.1578	0.1232	0.0912397
APOA4	SLAPYAQDTQEK	1.5832	1.2909	1.3496	1.2245	1.3494	1.2985	1.4135	1.3194	1.3011	1.2141	1.2678	1.1949	1.2303	1.2688	1.2211	1.334	1.5224	1.1946	0.0818951
APOA4	ISASAEELR	1.3007	1.0526	1.1701	1.0291	1.137	1.0892	1.1609	1.0764	1.0842	1.0151	1.0435	0.9951	1.037	1.0198	0.9974	1.0767	1.2189	0.9713	0.079627
APOL1	VTEPISAESGEQVER	2.1913	1.7434	2.0296	1.6875	1.8413	1.9136	2.1498	1.9527	1.8221	1.8136	2.0688	1.7355	1.8052	1.8995	1.7394	1.9572	2.2029	1.6726	0.0893511
APOL1	LNILNNNYK	0.1414	0.1239	0.1411	0.1198	0.1405	0.1331	0.1403	0.1348	0.1293	0.1184	0.1263	0.1222	0.1266	0.1241	0.1246	0.1316	0.1363	0.1184	0.0621374
ATRN	YGHSLALYK	0.0358	0.0289	0.0321	0.0302	0.0316	0.0341	0.0323	0.031	0.0315	0.0295	0.0319	0.0267	0.0313	0.0303	0.0295	0.0354	0.0391	0.0267	0.0983274
ATRN	SVNNVVVR	0.0209	0.017	0.0191	0.0169	0.0183	0.0179	0.0186	0.0175	0.0176	0.0165	0.0169	0.017	0.016	0.0164	0.0168	0.0174	0.0218	0.0155	0.0913207
APOM	WIYHLTEGSTDLR	0.095	0.0756	0.0817	0.0735	0.0781	0.0798	0.0826	0.072	0.0717	0.0704	0.0719	0.0694	0.0713	0.0736	0.073	0.0824	0.0912	0.0703	0.0955302
APOM	SLTSCLDSK	0.2089	0.1869	0.1883	0.1912	0.205	0.1859	0.184	0.1828	0.1823	0.1651	0.1698	0.1691	0.1709	0.1792	0.1725	0.175	0.2108	0.1639	0.0777394
APOA2	SPELQAEAK	17.746	15.3292	17.4737	15.8068	16.3255	15.5713	16.4605	15.4409	14.994	14.5848	14.5592	14.2834	15.2366	14.6521	14.4865	16.7382	18.5515	14.0759	0.0821355
APOA2	EQLTPLIK	2.2808	1.931	2.1504	1.8008	2.0388	1.9238	2.0752	1.9224	1.8928	1.7881	1.8266	1.7393	2.0494	1.8584	1.8051	2.0377	2.2794	1.7481	0.08627
APOC3	DYWSTVK	1.97	1.6597	1.8229	1.6627	1.7356	1.7046	1.7768	1.6267	1.7196	1.5591	1.6118	1.5382	1.6908	1.6627	1.5584	1.813	1.8891	1.4912	0.0745015
APOC3	DALSSVQESQVAQQAR	13.7471	9.0561	10.8203	10.6449	9.5222	9.4405	10.0427	10.0104	10.4001	10.0244	10.4045	9.2937	10.513	10.8981	12.2025	11.632	14.5453	9.8537	0.137905
APOH	TFYEPGEEITYSCKPGYVSR	4.4126	3.5543	3.627	3.4207	3.741	3.7145	3.7821	3.684	3.6662	3.3879	3.448	3.3118	3.3672	3.4144	3.4388	3.7444	3.914	3.1588	0.0783726
APOH	TCPKPDDLPFSTVVPLK	1.4459	1.1621	1.2983	1.122	1.2386	1.2467	1.3049	1.2885	1.1877	1.1166	1.1244	1.106	1.2146	1.169	1.1795	1.356	1.3296	1.0695	0.0830159
AHSG	HTLNQIDEVK	3.6113	2.9342	3.3482	2.989	3.1262	3.039	3.2133	3.1001	3.0568	2.8209	2.8693	2.8513	2.9934	2.8565	2.8563	2.8584	3.7575	2.6915	0.0913965
AHSG	FSVVYAK	1.091	0.8983	0.9707	0.8553	0.9439	0.9048	0.9829	0.9154	0.8995	0.8464	0.877	0.8239	0.8733	0.8625	0.8524	0.972	1.059	0.8011	0.085462
APOD	MTVTDQVNCPK	1.1092	0.9281	0.9985	0.8995	0.9937	0.9904	0.989	0.951	0.8923	0.8547	0.8713	0.8678	0.8926	0.8353	0.8745	1.0154	1.1897	0.7964	0.105374
APOD	IPTTFENGR	1.0842	0.9224	0.9614	0.8376	0.9703	0.9978	1.0124	0.8827	0.8628	0.8709	0.8967	0.8604	0.8999	0.8415	0.8136	0.9315	1.0188	0.8038	0.0857265
APOD	NILTSNNIDVK	0.394	0.3273	0.3814	0.3219	0.4018	0.3546	0.3762	0.3441	0.341	0.3315	0.3379	0.3249	0.3833	0.3382	0.3415	0.3573	0.4061	0.3195	0.0807156
AZGP1	EIPAWVPFDPAAQITK	0.3658	0.2931	0.2598	0.2784	0.3052	0.3338	0.3265	0.3062	0.2927	0.2874	0.2826	0.2711	0.2987	0.2876	0.285	0.3185	0.3606	0.2737	0.09776
AZGP1	IDVHWTR	0.2157	0.1843	0.1435	0.1676	0.1939	0.1902	0.198	0.1667	0.1802	0.1609	0.1689	0.1594	0.1707	0.169	0.1682	0.1848	0.2141	0.1568	0.109701
AZGP1	WEAEPVYVQR	0.0851	0.0643	0.0481	0.0652	0.0723	0.0689	0.0761	0.0694	0.0699	0.0627	0.0613	0.0602	0.0631	0.0674	0.0619	0.0709	0.0808	0.0618	0.124768
CP	LISVDTEHSNIYLQNGPDR	1.3231	1.0448	1.3059	1.0202	1.1529	1.1747	1.2	1.0629	1.0442	1.0219	1.0679	1.0239	1.0193	1.0523	0.9549	1.1144	1.3789	1.0222	0.109089
CP	ALYLQYTDETFR	0.7707	0.6272	0.6851	0.6086	0.6547	0.6561	0.7171	0.659	0.6305	0.6084	0.6314	0.6047	0.6215	0.6237	0.6212	0.6698	0.6577	0.6045	0.0669315
F10	TGIVSGFGR	0.0651	0.0584	0.0567	0.0472	0.0565	0.055	0.0608	0.0502	0.0524	0.0502	0.0525	0.0497	0.0511	0.0514	0.0514	0.0578	0.0628	0.0457	0.0985172
F10	ETYDFDIAVLR	0.0062	0.0045	0.005	0.0048	0.0049	0.0059	0.0055	0.0052	0.0045	0.0048	0.0052	0.0045	0.0049	0.0045	0.0041	0.0048	0.0053	0.0049	0.1048
F2	ELLESYIDGR	1.3922	1.1439	1.1549	1.0582	1.1581	1.1668	1.2336	1.1777	1.1492	1.0434	1.0883	1.0207	1.1208	1.1109	1.0566	1.1897	1.4353	1.0396	0.0972203
F2	GQPSVLQVVNLPIVERPVCK	1.2029	0.9888	1.0627	0.8981	1.0552	1.0796	1.0454	0.9701	0.9876	0.8817	0.9413	0.9548	0.9259	0.9802	0.9464	1.1133	1.1171	0.8826	0.0894753
FGB	AHYGGFTVQNEANK	13.7858	12.8715	11.6718	10.5583	10.4273	10.3893	12.4677	13.7649	10.313	9.3762	9.9288	9.2435	9.8175	9.7667	9.6452	11.304	11.1614	9.442	0.13519
FGB	EDGGGWWYNR	14.5076	12.7022	12.0415	10.5161	10.7661	11.3297	12.121	14.3198	10.1474	9.419	10.0776	9.3895	9.9708	9.9204	9.9037	11.0867	11.9465	9.1048	0.144434
FGB	EEAPSLRPAPPPISGGGYR	8.3342	7.7694	7.1	5.895	6.245	6.0759	7.1574	8.4832	6.1777	5.7081	5.7666	5.5279	5.8565	5.8708	5.7249	6.7057	6.5675	5.3373	0.146865
HP	YVMLPVADQDQCIR	34.3682	28.1112	33.0725	26.3017	28.894	29.2889	30.1026	28.2755	27.156	25.7293	26.256	25.7878	28.2108	28.9639	27.4576	30.4937	32.1877	25.4777	0.0899713
HP	SPVGVQPILNEHTFCAGMSK	24.0238	19.4842	23.5458	18.7459	20.5047	20.4761	19.346	19.1209	19.4522	18.3418	17.7255	18.2009	20.1517	18.8121	18.5479	20.5075	23.4839	16.942	0.101213
LCAT	SSGLVSNAPGVQIR	0.0337	0.0227	0.0342	0.0364	0.0297	0.0299	0.0305	0.0243	0.026	0.0236	0.0272	0.0267	0.0306	0.0239	0.0231	0.0348	0.0297	0.0219	0.161473
LCAT	STELCGLWQGR	0.0343	0.0312	0.0356	0.0322	0.0329	0.0317	0.0348	0.0302	0.0322	0.0269	0.032	0.0278	0.0303	0.0292	0.0299	0.0356	0.0363	0.0299	0.0852162
LCAT	ITTTSPWMFPSR	0.0328	0.0314	0.0314	0.0266	0.0317	0.0253	0.0284	0.0258	0.0263	0.0279	0.0264	0.0258	0.0263	0.0279	0.0272	0.0318	0.0366	0.0224	0.121828
LRG1	DLLLPQPDLR	0.1542	0.1269	0.1347	0.1231	0.1332	0.1331	0.1373	0.1268	0.1269	0.1203	0.1286	0.1179	0.1239	0.1229	0.1194	0.1167	0.1619	0.1105	0.0987332
LRG1	VAAGAFQGLR	0.1611	0.1247	0.1486	0.1251	0.1412	0.1526	0.1493	0.1357	0.1371	0.1318	0.136	0.1278	0.1354	0.1276	0.1335	0.1533	0.1617	0.1283	0.0865552
MBL2	WLTFSLGK	0.0087	0.0064	0.0064	0.006	0.008	0.0078	0.0075	0.0064	0.0065	0.0067	0.0062	0.0067	0.0073	0.0065	0.006	0.0062	0.0084	0.0063	0.122658
MBL2	FQASVATPR	0.0222	0.0192	0.0206	0.019	0.0184	0.0197	0.02	0.019	0.0174	0.0177	0.0178	0.0178	0.0197	0.0183	0.0182	0.0175	0.0217	0.0165	0.0801613
PLG	HSIFTPETNPR	0.4073	0.3287	0.3579	0.3287	0.3467	0.3357	0.3573	0.3544	0.3406	0.3243	0.3367	0.3143	0.3297	0.3242	0.3242	0.364	0.3877	0.3063	0.0744068
PLG	FVTWIEGVMR	1.3403	1.0833	1.1738	0.9625	1.1349	1.1477	1.1812	1.0859	1.0768	0.9838	1.0485	0.979	1.0727	0.9833	0.9691	1.0313	1.2771	0.9568	0.101842
PRG4	ITEVWGIPSPIDTVFTR	0.0154	0.0114	0.0129	0.0103	0.0121	0.0132	0.0137	0.0121	0.0116	0.0114	0.0126	0.0111	0.0119	0.011	0.0111	0.0107	0.0115	0.0121	0.101874
PRG4	GLPNVVTSAISLPNIR	0.1454	0.1103	0.1218	0.0886	0.1051	0.1079	0.121	0.1086	0.1048	0.1068	0.1198	0.1137	0.1044	0.1035	0.1062	0.1007	0.1088	0.1067	0.106318
PROS1	IETISHEDLQR	0.2421	0.2003	0.2256	0.1974	0.2094	0.211	0.2241	0.2074	0.2037	0.1877	0.1884	0.1821	0.1956	0.194	0.1866	0.2039	0.2541	0.1791	0.0991857
PROS1	IQALSLCSDQQSHLEFR	0.2438	0.1996	0.2342	0.1932	0.2182	0.2093	0.2365	0.2139	0.2032	0.2021	0.2155	0.1919	0.2127	0.2005	0.195	0.2334	0.2461	0.1995	0.0832975
SAA1	FFGHGAEDSLADQAANEWGR	0.0707	0.0588	0.0658	0.0646	0.068	0.0588	0.0624	0.0571	0.0522	0.0529	0.058	0.0542	0.0588	0.0568	0.054	0.0644	0.0751	0.0542	0.108186
SAA1	SFFSFLGEAFDGAR	0.1241	0.0823	0.0898	0.0801	0.1109	0.1008	0.0967	0.0875	0.0967	0.0881	0.0954	0.0842	0.0959	0.0752	0.08	0.0944	0.1044	0.0937	0.128055
SERPINA1	LQHLENELTHDIITK	6.6576	5.4417	6.2558	5.5824	5.8453	5.802	6.1137	5.8521	5.539	5.5667	5.5598	5.3176	5.4479	5.4754	5.4182	6.2046	6.5406	5.2731	0.0726085
SERPINA1	LSITGTYDLK	9.0983	7.2731	8.7037	7.0497	8.1635	8.2425	8.4462	7.6918	7.5389	7.4841	7.7621	7.5204	7.8348	7.1123	6.9453	8.3973	8.5425	7.2256	0.080531
SERPINA1	SVLGQLGITK	8.6175	7.127	7.9906	6.84	7.6908	7.4985	7.9477	7.4487	7.182	6.935	7.1741	6.9165	7.3321	6.9895	7.0077	7.7545	8.9897	6.748	0.0830391
SERPINA3	ITLLSALVETR	3.0105	2.3895	2.797	2.3299	2.739	2.9005	3.0825	2.785	2.8268	2.9282	2.9927	3.0611	2.9973	2.3328	2.2742	2.6283	0.0657	2.8235	0.098644
SERPINA3	EIGELYLPK	1.3718	1.1466	1.0027	1.0638	1.1936	1.151	1.2331	1.1404	1.135	1.0797	1.0915	1.0631	1.1578	1.1012	1.1164	1.2403	1.3964	1.0286	0.0920027
SERPINA3	EQLSLLDR	1.5465	1.2466	1.4146	1.1637	1.2764	1.3144	1.3998	1.269	1.2373	1.192	1.2354	1.1845	1.2277	1.2463	1.1672	1.3678	1.4335	1.1242	0.0872717
SERPINC1	EVPLNTIIFMGR	1.7401	1.3742	1.5015	1.3133	1.5638	1.5883	1.5804	1.4512	1.3987	1.4065	1.4804	1.3987	1.4599	1.3115	1.3232	1.7655	1.7186	1.3469	0.0986368
SERPINC1	ANRPFLVFIR	0.9608	0.7786	0.948	0.7311	0.8689	0.885	0.8784	0.8025	0.7816	0.7952	0.835	0.8075	0.8382	0.7373	0.7308	0.9155	0.9537	0.7512	0.0930948
SERPINF1	ELLDTVTAPQK	0.2437	0.1799	0.1868	0.1812	0.211	0.2009	0.2082	0.1871	0.2043	0.1839	0.1813	0.1711	0.1881	0.1883	0.1836	0.2184	0.227	0.1721	0.101374
SERPINF1	TVQAVLTVPK	0.1646	0.1216	0.1487	0.1205	0.1508	0.142	0.1433	0.1289	0.133	0.1307	0.1378	0.1224	0.1212	0.1292	0.1209	0.1348	0.1541	0.1259	0.0970321
SERPING1	GVTSVSQIFHSPDLAIR	1.4408	1.164	1.2456	1.1429	1.2978	1.28	1.3311	1.1663	1.1593	1.151	1.1348	1.111	1.2191	1.134	1.1218	1.2175	1.4989	1.0866	0.0942092
SERPING1	TNLESILSYPK	2.605	2.2681	2.196	2.0608	2.3214	2.3399	2.3257	2.215	2.1611	2.1378	2.1916	2.009	2.2138	2.0887	2.1369	2.1965	2.8365	1.9652	0.0927727
C1QA	DQPRPAFSAIR	0.4361	0.3635	0.3733	0.3578	0.3652	0.3788	0.3946	0.3373	0.3362	0.3524	0.3528	0.3368	0.3554	0.3639	0.3492	0.354	0.4185	0.3268	0.0780193
C1QA	SLGFCDTTNK	0.0253	0.0148	0.0515	0.0407	0.026	0.0795	0.0375	0.049	0.0243	0.0316	0.0295	0.032	0.0858	0.0482	0.0282	0.0544	0.0675	0.0389	0.459442
CFI	VFSLQWGEVK	0.1539	0.124	0.1427	0.1141	0.1289	0.1307	0.1334	0.1266	0.1233	0.1213	0.125	0.1145	0.1268	0.1195	0.1201	0.1209	0.1453	0.108	0.0907563
CFI	AQLGDLPWQVAIK	0.2566	0.2131	0.2355	0.1946	0.2216	0.2288	0.2297	0.2016	0.2083	0.1978	0.2009	0.1928	0.2021	0.1955	0.1958	0.2303	0.2353	0.1886	0.0911946
IGF2	SCDLALLETYCATPAK	0.0477	0.0376	0.0422	0.037	0.0397	0.0395	0.0413	0.0381	0.0364	0.0305	0.0295	0.0421	0.0364	0.0385	0.0387	0.0469	0.047	0.0366	0.126192
IGF2	GIVEECCFR	0.0283	0.024	0.0269	0.0222	0.025	0.0259	0.0265	0.0247	0.0235	0.0211	0.0223	0.0209	0.023	0.0243	0.0216	0.0249	0.0245	0.0205	0.0922558

## Sheet: Supply_Table 8
Supplemental Table 8. The ratios of 42 biomarker candidates from the cross-laboratory multiplex assay validation in 70 healthy subject samples and in the commercial pooled plasma sample.
	PNNL																																										UB
Sample ID	APOB	AGT	APOE	CD14	CRP	IGFBP3	LBP	LPA	PON1	RBP4	SHBG	VWF	APOA4	APOL1	ATRN	APOM	APOA2	APOC3	APOH	AHSG	APOD	AZGP1	CP	F10	F2	FGB	HP	LCAT	LRG1	MBL2	PLG	PRG4	PROS1	SAA1	SERPINA1	SERPINA3	SERPINC1	SERPINF1	SERPING1	C1QA	CFI	IGF2	APOB	AGT	APOE	CD14	CRP	IGFBP3	LBP
810	1.4256	1.1322	1.2939	0.0456	0.3068	0.2017	0.2278	0.0529	1.3293	10.8317	0.0363	0.0818	3.5383	0.3866	0.1236	0.5792	84.6135	23.5096	13.8971	5.3298	2.2218	0.7634	6.6101	0.4555	9.0815	94.9647	376.963	0.2208	2.2676	0.1342	2.4844	0.5893	1.6725	1.3337	23.5394	11.8971	6.4349	1.6285	14.7825	3.3288	1.5646	0.353	0.4776	0.1983	0.5	0.005	0.139	0.0971	0.1225
811	0.6427	1.0966	0.786	0.0217	0.0097	0.1884	0.0778	0.0326	1.181	3.8854	0.0464	0.0138	0.9663	0.455	0.0753	0.4583	56.8606	2.7915	5.0073	4.2435	1.633	0.2113	3.1121	0.232	4.9657	8.3987	74.1391	0.122	0.4398	0.255	1.3693	0.2552	0.7814	0.0711	28.9572	5.5467	4.2153	0.6887	11.34	1.4684	0.3874	0.21	0.3898	0.2972	0.4221	0.0047	0.0274	0.0883	0.0582
813	1.4238	0.9772	2.551	0.0387	2.1984	0.232	0.2495	0.0018	0.8893	4.3285	0.0436	0.0379	0.5658	0.4219	0.1015	0.5261	63.0227	4.9538	6.5256	2.3901	1.6971	0.2797	8.0216	0.2842	8.149	45.0455	170.65	0.1947	1.503	0.1101	2.1243	1.0893	1.1333	2.7756	45.3025	9.7828	4.899	0.9035	20.503	2.2997	1.1345	0.2894	0.6811	0.2444	1.1523	0.0085	1.1514	0.107	0.166
814	1.2267	0.7845	2.1044	0.0316	0.4844	0.1981	0.1391	0.1961	1.5049	3.4807	0.0176	0.0375	0.705	0.779	0.089	0.4951	68.552	5.3519	6.2364	5.1291	2.088	0.3386	5.4569	0.3292	6.7434	70.9424	142.265	0.1887	1.018	0.1374	1.9215	0.9898	1.015	0.8957	33.1763	7.8391	4.7175	0.8761	10.81	2.2069	0.7208	0.247	0.5229	0.1907	0.8592	0.0049	0.2082	0.0937	0.0952
816	1.2613	1.2985	1.3538	0.0278	0.0281	0.2354	0.0472	0.1811	1.3071	4.9095	0.0312	0.0629	1.0798	0.6583	0.0526	0.513	73.0102	4.7249	8.5824	5.0018	2.047	0.3606	4.2622	0.3186	7.1236	48.107	169.79	0.1553	0.7162	0.1295	2.1223	0.5635	1.0528	0.418	40.6785	8.3912	6.5225	0.9168	13.9545	1.5629	0.588	0.3138	0.46	0.2871	0.5445	0.0043	0.0468	0.0705	0.0302
817	0.7462	0.8557	0.616	0.028	0.146	0.1742	0.0894	0.1125	0.6926	4.9466	0.0336	1.0949	0.9481	0.3254	0.0655	0.8289	67.3302	9.7868	6.6597	4.2051	2.5648	0.3461	6.4674	0.327	7.5721	152.867	98.522	0.2094	0.365	0.3094	1.7027	1.1521	0.7696	0.1397	33.727	6.2213	3.8116	0.7204	5.4644	2.8029	0.4642	0.2049	0.2817	0.136	0.2445	0.0041	0.0895	0.0634	0.0619
818	2.2295	1.9746	3.1186	0.0434	2.4061	0.3834	0.2618	0.6512	2.3301	7.1029	0.0255	0.1155	0.5181	1.7685	0.1383	0.7966	114.825	15.528	9.7417	6.295	1.6186	0.4134	9.3992	0.4401	10.9421	71.7853	253.534	0.2866	1.2772	0.0519	2.4862	3.1118	1.5134	2.4812	44.9787	14.0868	6.9693	1.0115	11.3619	2.2664	1.3301	0.4271	0.5242	0.3039	1.0613	0.0066	0.6199	0.1556	0.1396
820	2.272	1.6395	2.396	0.0353	0.5557	0.3868	0.1757	0.0286	1.7724	8.2847	0.0189	0.0376	1.8421	1.3114	0.1392	0.7576	103.74	22.658	13.2539	5.9453	2.4147	0.4728	5.3472	0.42	13.6838	77.2815	194.278	0.3414	0.8455	0.1792	3.0906	2.5719	1.8355	1.2915	43.1086	9.5978	7.3566	1.3483	15.8754	3.3538	1.2368	0.4604	0.523	0.1733	0.6578	0.0046	0.16	0.1177	0.0733
821	2.6365	2.745	4.6095	0.0795	1.3896	0.3633	0.3165	0.0187	2.8454	9.4128	0.029	0.083	1.1683	0.8043	0.1173	0.8297	134.634	16.2771	13.545	7.2819	3.2071	0.5516	11.1464	0.5989	13.7374	99.7532	412.436	0.2602	2.4701	0.118	4.128	3.4127	1.7411	8.6748	70.2186	18.9392	8.6474	1.7345	23.3383	2.7595	1.9204	0.5017	0.4909	0.3224	1.2101	0.0056	0.2518	0.0787	0.1078
822	0.9616	1.4209	4.2572	0.0299	0.1269	0.1525	0.1519	0.0191	2.345	7.0943	0.0712	0.1101	0.9495	0.7098	0.114	1.08	186.94	13.0201	10.7597	8.5146	4.6608	0.4182	7.645	0.4861	8.6033	78.1025	49.7033	0.2023	1.0693	0.3245	3.5068	1.4914	1.613	0.4435	76.6429	11.6458	5.1028	1.2398	0.0336	2.668	0.8309	0.2424	0.3218	0.1604	1.3233	0.0027	0.0459	0.0503	0.0715
824	0.8726	1.197	1.1606	0.0358	2.6841	0.2117	0.208	0.1126	1.6682	5.4061	0.05	0.0827	0.7065	1.0357	0.1149	0.6462	87.853	5.9855	6.3131	5.595	2.8525	0.3763	7.2246	0.3548	7.1795	82.9328	0.0163	0.1861	2.1127	0.0319	2.4019	1.2472	1.0841	105.405	44.2139	16.9373	5.7486	1.0513	11.5154	1.6996	0.7802	0.1826	0.377	0.1977	0.5324	0.0038	0.9302	0.1073	0.1182
825	0.9734	1.236	1.2213	0.0243	0.2666	0.2263	0.0727	0.0028	1.8156	6.147	0.0236	0.0442	0.3537	0.779	0.0866	0.4214	71.0358	5.8661	5.0358	3.8592	2.1036	0.265	5.4535	0.2415	7.4772	48.8825	101.858	0.1431	0.4389	0.0228	1.5119	0.6148	0.9488	0.8202	25.9346	7.1591	4.3822	0.7123	6.0391	1.8944	0.6842	0.2711	0.3996	0.2349	0.6686	0.0045	0.1265	0.1101	0.0584
826	0.4058	1.0152	0.6093	0.0306	0.9129	0.1909	0.1569	0.0955	0.9368	4.6312	0.0306	0.0545	1.3498	0.68	0.0853	0.3473	55.4468	3.5203	6.4677	3.7796	2.4289	0.3401	5.2907	0.3047	6.4974	57.2812	203.955	0.1567	0.7891	0.1132	1.7811	0.3802	1.0008	1.4016	38.7849	9.5988	4.8401	0.704	7.185	1.862	0.5538	0.2534	0.162	0.19	0.2581	0.0046	0.2882	0.0876	0.088
828	0.9568	0.9641	2.0548	0.0318	1.8746	0.2149	0.2309	0.0023	1.2885	5.0129	0.027	0.076	1.3136	0.4687	0.0929	0.4636	55.423	18.4999	7.9427	5.0409	1.4948	0.3765	5.5624	0.3726	8.0908	102.347	374.188	0.1936	1.5446	0.1279	2.4862	0.9429	1.5479	13.5946	26.6877	12.5636	4.6458	1.0529	17.8015	2.2106	1.2832	0.232	0.3127	0.161	0.6796	0.0051	0.4782	0.0742	0.1143
830	0.8211	0.8203	1.9512	0.0278	0.1689	0.1825	0.1549	0.0599	1.254	3.9107	0.0272	0.3757	0.3197	0.5161	0.0801	0.4583	61.157	4.3068	6.6431	4.219	2.2314	0.238	7.7063	0.2605	7.7452	59.844	195.286	0.1409	0.9321	0.2104	1.8928	0.7841	1.066	1.2245	42.9116	8.442	4.2711	0.741	4.7224	1.6789	0.5829	0.2048	0.3124	0.1699	0.7749	0.0045	0.0842	0.0689	0.0871
831	0.908	0.8081	5.3251	0.0278	0.2532	0.1814	0.1298	0.1007	1.5095	5.3143	0.1092	0.3513	0.6063	0.3715	0.0771	0.4452	59.1128	9.2324	5.0649	4.0722	1.8199	0.298	5.1829	0.2522	6.4216	58.5666	152.744	0.1216	0.8745	0.0779	1.7926	0.944	0.9916	0.8864	38.4529	6.2427	5.0926	0.8604	11.1369	2.3009	0.7512	0.2222	0.1522	0.1029	1.2634	0.0041	0.0828	0.0453	0.0574
832	1.4419	0.9057	1.6318	0.0259	0.1792	0.1798	0.1186	0.0543	0.8149	3.0324	0.049	0.1323	1.1842	0.31	0.094	0.5332	71.3861	6.0236	7.4727	5.9641	2.4831	0.332	4.3596	0.2903	7.1624	46.7018	128.581	0.2086	0.725	0.0971	1.8467	0.5717	0.9586	0.3887	42.3391	7.9357	6.2329	1.0816	9.9166	2.0176	0.7245	0.2329	0.5261	0.2453	0.5798	0.0057	0.0351	0.076	0.069
834	3.3881	2.0429	5.6144	0.0454	0.3014	0.3698	0.2746	0.0503	3.5233	10.8512	0.0877	0.2167	1.5003	1.4433	0.1676	1.3023	116.02	12.0326	7.1489	10.1495	5.3472	0.7458	13.1489	0.4682	17.1102	115.724	325.461	0.4214	1.5082	0.3588	1.9607	1.9782	2.1209	3.1455	61.1065	13.5575	11.3351	1.6224	42.0739	3.6373	1.4903	0.4184	0.6407	0.1786	1.2964	0.0044	0.085	0.0736	0.0776
835	1.1974	0.9808	2.145	0.0369	0.1617	0.2386	0.0936	0.0582	1.4839	5.6878	0.0541	0.0546	1.4484	0.4027	0.0828	0.5346	89.0896	8.4091	7.0941	4.8158	3.1551	0.4003	5.4389	0.3138	7.219	45.8782	109.823	0.1637	0.7998	0.08	1.7708	0.7686	1.0341	0.2536	20.4105	7.4633	4.9684	0.7695	17.9272	1.9304	0.767	0.2516	0.5685	0.2076	0.9247	0.004	0.0967	0.0937	0.0667
836	0.5262	0.7815	2.1767	0.0245	0.2993	0.1394	0.0738	0.0015	1.6211	4.3598	0.085	0.2093	0.9139	0.5125	0.0894	0.655	82.0088	4.9755	6.2238	4.4889	1.9725	0.335	5.9507	0.2288	7.2324	48.1979	97.8535	0.1427	0.8615	0.1923	1.8921	0.4642	0.7179	1.7924	38.0431	6.2393	4.8976	0.7717	7.7462	1.6565	0.5626	0.1702	0.3119	0.3245	0.9516	0.0091	0.1046	0.0988	0.0447
837	0.8235	0.8786	0.6244	0.0251	0.7975	0.1396	0.097	0.1569	0.96	4.0276	0.0516	0.04	1.317	0.3624	0.0769	0.4747	81.7935	7.7815	8.3084	4.4929	2.2714	0.301	4.8375	0.2836	6.6375	45.3145	177.21	0.1353	0.9579	0.0792	1.6659	0.4792	1.0174	0.2115	21.1171	8.6162	4.287	0.7064	16.6626	1.7878	0.6255	0.1634	0.34	0.2714	0.2621	0.0054	0.2999	0.0896	0.0599
839	1.1699	0.8301	1.6037	0.0277	0.539	0.1459	0.134	0.0512	1.2856	5.5694	0.0504	0.0181	1.1359	0.3229	0.0896	0.52	60.765	6.2338	6.4091	3.2358	1.33	0.3337	4.7058	0.3153	7.217	53.2104	152.117	0.1487	1.0333	0.078	1.5512	0.5069	1.2406	0.7882	16.169	8.5172	5.6524	0.7043	13.9185	2.1275	0.8107	0.1359	0.5632	0.2026	0.718	0.0039	0.2209	0.0977	0.0775
841	1.5068	1.3631	2.6651	0.0247	0.5369	0.1647	0.1541	0.1148	1.4444	5.288	0.0401	0.019	0.7187	1.2415	0.1082	0.5843	90.3742	7.6831	7.8512	4.2443	1.395	0.3298	3.7545	0.3222	10.6569	42.5178	72.8057	0.2151	0.5559	0.0308	1.7405	1.613	1.0874	1.3312	35.9229	7.2308	4.5771	1.0172	15.1277	2.2094	0.7859	0.211	0.7462	0.3138	1.1335	0.0035	0.2071	0.0782	0.1024
842	0.5856	0.74	1.478	0.0228	0.0762	0.1681	0.0746	0.0499	0.9604	3.8774	0.0368	0.1358	0.8033	0.458	0.0725	0.4691	56.5206	4.2179	5.9602	4.108	1.6333	0.2335	4.1258	0.2379	5.2356	32.2956	95.0513	0.1643	0.4721	0.1107	1.4539	0.3549	0.7587	0.161	16.463	4.6567	4.3559	0.6233	5.3324	1.7156	0.5468	0.2109	0.2261	0.1911	0.6305	0.0038	0.0251	0.0772	0.0404
843	1.8725	1.0677	3.1034	0.0323	0.7244	0.2122	0.1547	0.0536	1.7493	5.3394	0.0182	0.9241	1.0413	0.7694	0.1003	0.7843	92.3247	13.183	8.655	5.3189	1.9844	0.3934	4.697	0.3816	7.2272	66.8878	87.4873	0.2015	0.8965	0.0845	2.0189	1.8855	1.1504	1.3018	36.9437	7.7432	5.1198	1.2404	7.0115	2.2816	0.9632	0.2707	0.4069	0.1928	1.0495	0.0041	0.2928	0.1094	0.0768
844	1.3339	1.0149	1.7449	0.0351	0.0946	0.2244	0.0136	0.201	1.5295	5.2755	0.0603	0.4154	0.5667	0.9055	0.1008	0.6112	73.097	5.1575	8.3327	5.1491	2.9172	0.3907	5.9408	0.297	8.2358	47.9595	144.079	0.2008	0.6952	0.1868	1.7285	0.6399	1.0569	0.2896	36.4536	7.3979	5.978	0.861	9.586	2.1407	0.6262	0.2471	0.359	0.1491	0.4704	0.0038	0.027	0.0703	0.0072
846	1.3435	1.0961	1.0415	0.0371	0.3811	0.1541	0.1552	0.1139	1.6306	3.5257	0.0534	0.1192	0.5182	0.9966	0.0808	0.5612	55.4402	5.5157	6.175	4.8081	1.2994	0.3137	8.9625	0.3119	5.7442	61.62	130.316	0.1736	0.9749	0.0538	2.0393	1.1579	0.9955	1.1402	36.7824	9.2638	5.5419	0.9471	9.6005	2.2211	0.9317	0.1967	0.3206	0.1508	0.3571	0.0043	0.114	0.0531	0.0807
847	0.4643	1.2726	3.4903	0.0356	0.2221	0.1683	0.152	0.0043	1.0565	3.3958	0.0733	0.1073	0.7764	0.5572	0.09	0.4879	61.7162	3.2982	5.774	4.6919	2.051	0.296	4.7567	0.2686	6.7866	52.6394	216.804	0.1639	1.1604	0.0509	1.6105	0.7372	0.8363	0.6378	51.756	11.7834	4.8153	0.6603	15.9281	1.7935	0.5876	0.255	0.2177	0.2258	1.5684	0.0051	0.0686	0.1194	0.087
849	1.221	1.3472	1.5488	0.0321	0.0696	0.1804	0.0947	0.0965	1.824	5.5129	0.042	0.0664	1.8831	0.3222	0.0689	0.7667	77.5025	10.3732	7.6327	5.1117	3.0147	0.3996	7.1123	0.3469	10.368	24.6182	184	0.2108	0.4453	0.091	1.9572	0.866	1.1682	0.1302	46.2045	8.2872	5.554	0.9571	18.7504	2.4344	0.8314	0.2379	0.5626	0.3344	0.5504	0.0057	0.0529	0.0838	0.0467
850	1.2967	0.8478	2.5225	0.0228	0.2284	0.1928	0.0469	0.0047	1.2218	4.8611	0.0242	0.2481	0.7389	0.5827	0.127	0.55	72.715	10.4202	5.7867	6.2002	1.706	0.2356	5.0127	0.3771	10.4766	55.924	129.283	0.1979	0.7101	0.0772	1.9986	1.1952	1.2551	0.3671	16.4513	6.0601	5.2177	0.7499	6.9229	2.339	0.8649	0.2041	0.4909	0.2278	1.107	0.0039	0.1416	0.0958	0.0402
851	1.0695	0.8108	1.3587	0.0268	0.1023	0.2559	0.0546	0.0037	1.5071	4.5087	0.0389	0.0356	0.7163	0.3325	0.0965	0.4567	79.5188	3.8752	6.0474	3.8578	2.1289	0.3036	5.0877	0.3459	7.3677	47.2989	141.724	0.1565	0.8354	0.0762	1.9578	0.8354	0.9711	0.2881	36.4086	8.133	5.1878	0.7538	11.0593	1.6876	0.7416	0.279	0.4739	0.1706	0.6815	0.0044	0.0578	0.1353	0.0489
853	1.1239	1.1062	1.963	0.0311	0.1568	0.1876	0.1029	0.0024	1.1682	5.4131	0.0338	0.0543	0.5532	0.3862	0.083	0.4965	56.7563	4.2882	7.8282	5.001	1.3501	0.3594	3.5672	0.2639	7.0084	36.7938	44.9674	0.14	0.8365	0.0964	1.6174	0.7552	0.8753	0.2495	39.3273	7.7435	4.6201	0.8499	14.8708	1.5324	0.5938	0.2079	0.3099	0.1746	0.8782	0.004	0.0454	0.0578	0.0452
854	0.8216	0.9218	1.4789	0.0274	0.1062	0.2571	0.0688	0.0012	1.1866	5.1835	0.0448	0.0334	0.8971	0.6387	0.0664	0.4576	65.162	5.1602	5.7355	4.268	1.8053	0.2452	4.6062	0.247	7.0027	41.0842	74.2936	0.1462	0.449	0.0791	1.841	0.3398	0.8834	0.0928	33.9905	7.6656	4.8714	0.7928	10.4576	1.8334	0.6443	0.2442	0.2392	0.1831	0.498	0.0044	0.0393	0.0688	0.0311
856	0.9386	1.1776	0.7967	0.0342	0.091	0.253	0.0932	0.0134	1.2054	7.1198	0.0327	0.1387	1.1387	0.4882	0.0756	0.4645	67.8853	7.4819	9.4515	4.3198	2.0305	0.4461	3.9904	0.2737	5.8533	45.1721	174.581	0.1499	0.7764	0.1088	1.7132	0.9107	0.8859	0.2385	35.9195	10.7323	5.8471	0.8529	9.3519	2.4615	0.7323	0.3064	0.3212	0.2023	0.3726	0.004	0.0512	0.0917	0.0739
858	0.8946	1.0497	0.802	0.039	0.3216	0.3251	0.1372	0.005	1.4348	6.0626	0.0265	0.0332	0.9553	0.7159	0.0778	0.4627	61.9139	6.4767	8.2283	4.5084	1.7915	0.3923	5.2027	0.3239	8.8465	53.3266	134.396	0.179	0.8614	0.1649	1.9919	1.3805	0.9375	0.9937	41.1136	7.7613	5.8475	0.8624	8.4269	2.1492	0.8446	0.3428	0.3086	0.2239	0.3772	0.0069	0.1267	0.1259	0.0814
859	1.2631	1.4814	2.6819	0.0332	1.0741	0.2323	0.1141	0.0712	2.6733	5.1821	0.0526	0.0909	0.5422	0.0017	0.1103	0.4251	104.872	7.156	7.83	5.4984	3.0025	0.2412	5.7846	0.2913	9.1662	74.5168	219.451	0.2512	0.7872	0.0198	1.8732	1.5226	1.591	2.8376	48.8469	7.4288	5.7177	0.7803	12.9709	2.1896	0.9267	0.2662	0.6953	0.3717	1.3233	0.0058	0.4702	0.131	0.0596
861	0.8507	1.1139	1.7769	0.0239	1.3231	0.2247	0.066	0.0209	0.8361	3.7148	0.0404	0.0763	0.5188	0.6101	0.0785	0.4038	57.346	5.0813	5.8226	5.5102	2.0789	0.3063	5.4388	0.2352	6.9633	55.268	204.004	0.1677	0.806	0.1002	1.8642	0.8395	0.8641	2.1796	32.1101	8.8641	4.4282	0.8042	5.7415	2.2604	0.7939	0.2479	0.4098	0.2223	0.9426	0.0053	0.5114	0.1064	0.0436
862	0.8222	1.3636	2.022	0.0322	0.476	0.2961	0.1211	0.1648	1.0222	4.344	0.0169	0.0766	0.7653	0.7853	0.0817	0.417	61.0091	5.742	6.3943	5.8973	1.1955	0.2889	4.763	0.246	6.4935	69.0343	155.645	0.1612	1.1699	0.1523	1.5377	0.8057	1.0849	1.3574	34.9085	6.418	4.6424	0.693	6.3516	1.9438	0.7534	0.327	0.3833	0.2914	0.9714	0.0048	0.2444	0.1154	0.0864
863	0.6768	0.9534	1.726	0.0268	0.0335	0.2319	0.0408	0.2776	0.0742	5.2057	0.0624	0.1436	0.6052	0.5806	0.0653	0.4354	64.3244	5.3314	5.24	5.1785	1.2549	0.3128	4.4312	0.236	7.3678	48.6724	125.356	0.158	0.6371	0.1718	1.6858	0.391	0.8276	0.5342	28.0138	5.811	4.6103	0.7733	9.613	1.3143	0.6029	0.2281	0.2985	0.1764	0.7911	0.0044	0.0399	0.0969	0.0271
865	0.6645	1.2481	3.2346	0.0262	0.3602	0.2359	0.0754	0.0321	1.3348	4.9781	0.0636	0.0854	1.1387	0.755	0.0996	0.5362	71.8958	7.9357	7.327	5.4416	1.8272	0.2965	5.7833	0.2914	6.489	66.2347	195.432	0.162	1.0807	0.1672	1.7638	0.8621	0.9138	1.2234	21.2492	9.6098	4.371	1.0265	11.1097	1.9023	0.7746	0.2319	0.3478	0.3274	1.517	0.0051	0.1859	0.1535	0.0582
866	1.1805	1.201	2.7704	0.0328	0.11	0.2202	0.095	0.15	1.4041	4.9659	0.0355	0.1007	1.0553	0.9418	0.0917	0.3305	63.3889	7.03	7.5189	5.0456	1.0703	0.2987	7.1551	0.2602	6.3657	62.0884	126.692	0.1636	0.8905	0.2544	1.8011	0.8615	0.9687	0.9642	37.6708	7.4003	4.3893	0.9012	13.2388	2.0472	0.7184	0.2653	0.4519	0.2607	1.1253	0.0042	0.0616	0.1101	0.0611
867	0.897	1.5137	1.7572	0.0317	0.503	0.2582	0.1297	0.021	1.3528	7.868	0.0323	0.08	0.786	0.5877	0.0922	0.5133	108.965	6.6844	8.5119	3.7763	0.9405	0.2967	3.6049	0.3443	7.3351	12.6525	130.458	0.2143	1.1365	0.0136	2.2917	0.925	1.1322	0.426	29.7572	5.4871	5.2176	0.7422	12.0559	1.9376	0.9081	0.3112	0.353	0.2875	0.8567	0.0052	0.1719	0.09	0.0935
869	1.3833	0.9787	2.3161	0.0394	0.1868	0.2243	0.1196	0.0155	1.5952	3.9151	0.0835	0.0222	1.2564	1.0142	0.0997	0.5225	63.291	7.6918	6.5174	6.7274	1.4143	0.3475	8.8988	0.3041	6.6167	59.607	118.109	0.2551	0.997	0.0963	1.7596	1.516	1.177	0.6241	41.2213	7.7402	5.8267	0.9101	11.0458	2.2589	1.023	0.3787	0.4919	0.1942	0.7816	0.0055	0.073	0.0795	0.0538
870	0.8072	1.9569	1.0166	0.0329	0.7899	0.2737	0.139	0.1847	1.8127	6.5236	0.1151	0.1019	1.0067	0.5592	0.0753	0.4501	84.1033	9.87	7.1413	5.586	1.9044	0.2521	8.3125	0.3425	9.819	46.8414	167.248	0.2024	1.1399	0.019	2.1488	1.341	1.0428	0.8859	40.0723	6.8455	4.9143	1.0059	11.7574	1.7906	0.8296	0.3715	0.2906	0.2817	0.4111	0.0052	0.3036	0.111	0.0991
872	0.932	0.8489	1.9891	0.0211	0.5573	0.2254	0.0625	0.0836	0.8425	3.691	0.0322	0.1934	0.7412	0.5051	0.0926	0.4833	76.6259	4.8268	6.6469	4.1026	1.5032	0.2294	4.4327	0.2596	5.4526	46.0533	216.873	0.1977	0.9789	0.1356	1.8774	1.0771	0.9471	1.4735	38.8909	8.6308	5.0076	0.876	7.5047	2.1675	0.9466	0.291	0.3734	0.1862	0.8019	0.0039	0.2042	0.0851	0.0422
873	0.9762	1.3821	1.4119	0.0417	0.2611	0.2553	0.1299	0.0106	2.242	4.3746	0.0547	0.1808	0.9563	0.7455	0.0912	0.6431	77.0321	4.6511	8.5447	7.1457	1.9653	0.3506	6.3701	0.2812	10.6107	55.0673	104.82	0.1849	1.1438	0.3156	2.1072	0.5833	0.9029	0.7316	47.2168	10.2357	6.952	1.0211	17.5958	2.3464	0.8893	0.2991	0.284	0.215	0.4544	0.0063	0.081	0.0893	0.0633
874	1.3999	1.0213	2.7158	0.0228	0.1207	0.1284	0.098	0.1623	1.0581	5.6002	0.0344	0.0274	0.5702	0.5947	0.0658	0.6118	60.2908	8.9047	6.2074	4.8297	1.0316	0.3252	5.7136	0.337	6.6572	47.4681	155.029	0.1356	0.6814	0.0715	1.9214	1.4212	1.0768	0.2852	14.5779	7.5898	4.4154	0.7347	12.5164	1.8551	0.7727	0.1415	0.6035	0.1978	1.1871	0.0043	0.0911	0.0513	0.0655
876	0.5962	0.8125	1.273	0.0218	0.1653	0.2036	0.0808	0.0238	1.1504	4.6579	0.042	0.1024	0.8605	0.4594	0.066	0.3726	58.826	4.3492	6.0465	4.7844	1.5968	0.2548	4.1391	0.2275	5.0653	55.0718	124.958	0.1599	0.8559	0.0533	1.2696	0.5343	0.7992	0.412	35.0254	7.1492	3.6276	0.6839	4.8097	1.4659	0.6206	0.2684	0.312	0.1962	0.6706	0.0058	0.105	0.0669	0.0614
878	1.1147	1.1422	2.2283	0.0247	0.2718	0.2245	0.0732	0.0189	1.369	5.9134	0.0273	0.0577	0.6647	0.5692	0.1016	0.377	80.1546	9.4403	7.3518	5.0954	1.4589	0.4038	6.0802	0.3177	8.1155	71.1439	110.486	0.2014	1.2505	0.0355	1.8083	0.8132	1.2427	0.9576	34.2929	8.4873	5.2568	0.8392	8.9011	1.8439	0.9363	0.2698	0.5304	0.2077	1.0972	0.0038	0.1364	0.1002	0.0583
879	0.534	0.7294	1.784	0.0196	0.0634	0.2001	0.0871	0.0051	1.2642	3.6914	0.0368	0.2304	0.4313	0.7453	0.0855	0.3452	61.005	3.8852	5.3161	4.6347	1.5901	0.184	2.5262	0.1984	6.4338	64.2839	146.294	0.1544	0.8058	0.1296	1.8333	0.4375	0.7741	0.3203	17.8232	6.5978	4.3807	0.4411	13.3899	1.7159	0.5762	0.1728	0.2669	0.1815	0.8514	0.0057	0.0645	0.0799	0.0691
880	1.0432	1.1366	1.9579	0.0354	0.2427	0.2463	0.0808	0.0036	1.3225	6.3362	0.022	0.0386	0.9866	0.7204	0.0852	0.4382	73.1672	9.9854	7.419	5.6733	1.4832	0.2924	5.1123	0.3014	10.143	62.0497	87.754	0.2255	0.5977	0.1018	2.021	0.7864	1.0589	0.6332	34.6778	7.4191	4.6163	0.7694	16.405	1.8238	0.991	0.2883	0.4274	0.2066	0.781	0.0051	0.1033	0.0867	0.0499
882	1.0736	1.2178	1.2279	0.0311	0.8617	0.183	0.154	0.0181	1.1864	4.2623	0.0567	0.0761	0.6379	0.5642	0.0844	0.4955	61.5	4.6489	7.3358	5.2801	0.9693	0.2772	10.1062	0.2687	6.7395	73.983	179.517	0.1883	0.7585	0.027	1.8078	0.9882	1.1794	1.2211	34.8891	8.1308	4.289	0.9418	10.5778	1.9235	0.9254	0.2689	0.3504	0.2081	0.5179	0.0051	0.3159	0.0814	0.0984
883	1.3957	1.7391	1.8664	0.0434	0.1752	0.256	0.1103	0.1037	1.584	4.996	0.0733	0.0485	0.9552	0.5909	0.0895	0.5893	67.5949	8.1045	9.2976	5.618	1.6326	0.3933	5.8633	0.3128	9.9641	39.8677	184.809	0.1902	0.8629	0.0754	1.7571	1.6367	0.9381	1.8344	49.6414	8.3501	5.5659	1.0536	10.9103	2.2494	0.9532	0.3345	0.3056	0.2454	0.8176	0.0049	0.0587	0.0819	0.0592
885	1.1312	1.7116	5.1013	0.0369	2.1847	0.2925	0.2071	0.1203	1.083	3.8666	0.0084	0.1228	0.6027	0.737	0.1198	0.3714	57.4507	14.0972	6.038	5.7858	0.4974	0.2195	4.7522	0.2995	4.4623	66.3181	217.575	0.1536	0.9699	0.0651	2.0761	1.8071	1.1183	2.0378	30.2043	6.4112	3.7949	1.1364	5.942	1.949	1.0113	0.4004	0.4073	0.2887	2.4405	0.0049	0.8833	0.1184	0.1656
887	0.6472	1.31	2.7075	0.0233	0.2565	0.1838	0.134	0.1608	1.1622	4.1562	0.0316	0.0428	0.4099	0.5179	0.0748	0.5417	74.8879	4.9608	4.9603	3.8547	1.5972	0.3268	5.2048	0.2607	6.7031	59.7003	123.175	0.1936	1.009	0.0422	1.7652	0.7144	0.8793	0.6686	34.2344	7.6129	4.3378	1.4473	8.795	1.4191	0.7145	0.2248	0.418	0.2943	1.6678	0.0026	0.1341	0.0908	0.0966
888	0.8854	1.0062	1.3047	0.021	0.3439	0.2099	0.0847	0.0032	2.0458	2.7628	0.034	0.087	0.7222	0.2316	0.0674	0.4751	73.0862	5.7727	5.7125	5.4911	1.3957	0.257	5.7824	0.2936	5.3129	52.6868	231.639	0.1578	0.5743	0.0973	2.0632	0.7411	0.756	0.397	44.161	8.5202	5.6704	0.7767	11.2764	1.6052	0.875	0.2305	0.3356	0.2626	0.4236	0.0043	0.0866	0.1044	0.0498
890	0.7652	0.8629	1.0988	0.0222	0.0237	0.2898	0.0714	0.0157	0.8361	3.5083	0.0385	0.1793	0.4508	0.3163	0.0563	0.2691	50.7181	5.0763	5.0692	3.9927	0.8323	0.1958	4.6104	0.1865	5.7728	39.9912	138.375	0.1628	0.771	0.1117	1.565	0.4727	0.6859	0.2108	25.4704	6.0468	4.2075	0.4625	10.3183	1.1687	0.4911	0.2588	0.5038	0.2803	1.0159	0.0039	0.2813	0.0887	0.0485
891	1.4766	1.3773	2.3208	0.0253	0.67	0.2163	0.0811	0.0981	1.7167	4.6758	0.0283	0.145	0.6225	0.6787	0.0979	0.5666	64.0973	7.4471	6.9024	4.8858	1.1182	0.2645	8.2816	0.3875	9.0564	59.8115	296.636	0.203	0.618	0.0342	2.0294	1.3221	1.2187	0.8317	31.6305	8.2487	4.8946	1.2234	8.7409	1.9843	1.0238	0.2314	0.3905	0.2948	0.6761	0.0062	0.03	0.1264	0.0629
892	0.9322	1.3027	2.1393	0.0267	0.0675	0.2194	0.0626	0.3697	1.6279	6.048	0.0372	0.1965	0.7862	0.3425	0.0751	0.3424	71.6848	5.6187	6.5587	3.8182	2.0857	0.4033	5.0459	0.3049	6.3236	7.2711	171.08	0.1711	0.5963	0.0642	1.292	0.7903	0.85	1.178	30.2885	7.4387	4.7671	0.7262	14.5482	1.6573	0.6854	0.2296	0.4481	0.2649	1.0598	0.0056	0.03	0.1242	0.045
894	0.8873	1.473	1.6265	0.0165	1.0573	0.1634	0.1279	0.0007	0.9388	4.2763	0.029	0.0157	0.4653	0.7875	0.0606	0.3118	61.4741	6.3838	4.8737	4.2429	1.0916	0.1217	5.0071	0.2735	6.3339	37.4336	141.991	0.0793	0.4633	0.1638	1.4855	0.8608	0.6396	0.4369	30.4712	4.0486	3.5012	0.6876	8.2072	1.2467	0.5452	0.2557	0.5241	0.3843	0.8649	0.0044	0.4609	0.1323	0.0876
896	1.1074	0.6447	1.9433	0.0234	0.1311	0.1744	0.0544	0.0193	1.3532	3.0513	0.0479	0.0112	0.696	0.7321	0.0707	0.4195	55.1006	6.1927	4.2857	4.7187	1.8571	0.2144	4.6416	0.1938	5.3587	51.629	77.5759	0.1134	0.6523	0.0787	1.4644	0.5622	0.7655	0.6742	24.5333	5.4375	3.5156	0.4714	10.5303	1.5942	0.5149	0.1775	0.648	0.1779	0.9687	0.0048	0.07	0.065	0.0402
897	0.9493	1.7425	1.8222	0.0228	0.8351	0.17	0.1882	0.1005	1.1019	6.5166	0.0256	0.0906	0.658	1.0046	0.0735	0.3949	61.4094	8.6827	5.5706	4.9481	0.8366	0.2161	5.556	0.3367	7.1908	55.5981	164.243	0.1318	0.8231	0.0604	1.9152	1.6633	0.9867	1.3231	25.7179	8.5514	4.1524	0.8758	5.8972	1.7241	0.9035	0.2098	0.485	0.4044	1.1141	0.0043	0.3649	0.0758	0.1352
899	0.3863	0.613	0.6896	0.0238	0.1887	0.2008	0.1312	0.0017	1.0403	2.0449	0.067	0.0598	0.3671	0.4045	0.0619	0.2879	53.9513	3.3119	4.105	4.2362	0.853	0.1421	3.4093	0.1839	5.2925	39.6944	92.6755	0.097	0.9134	0.1163	1.2439	0.186	0.611	1.4341	13.8732	5.2421	3.0882	0.4759	7.2435	1.1077	0.5176	0.2175	0.242	0.2029	0.4701	0.0059	0.1116	0.1169	0.1157
900	0.5377	1.6426	0.7224	0.025	0.8432	0.1206	0.1294	0.0028	1.3905	4.5983	0.055	0.0428	0.5701	0.3896	0.0622	0.3441	73.8153	5.5395	5.4078	4.505	1.0496	0.2532	5.1891	0.3563	8.6857	47.9385	123.493	0.1359	0.8371	0.0922	1.6087	0.4266	0.933	0.5623	37.3013	6.5986	3.7612	0.5748	10.3484	1.4673	0.5107	0.1638	0.2781	0.3592	0.382	0.0044	0.3339	0.0687	0.1142
901	1.0514	1.1239	2.2633	0.0257	0.4431	0.1408	0.1134	0.0024	1.2784	7.6584	0.0427	0.0443	1.4918	0.2054	0.1049	0.5801	70.5613	9.8279	8.1291	4.7477	1.3649	0.3206	4.6313	0.2587	6.3101	53.0202	146.45	0.2191	0.8023	0.0228	1.4386	0.8467	1.0337	4.1717	27.8659	9.3269	4.7447	0.7965	15.2982	1.8214	0.7462	0.2361	0.5437	0.2788	1.2803	0.0062	0.2165	0.0501	0.0989
903	0.8677	1.157	2.6835	0.0207	0.0529	0.2066	0.0851	0.0155	1.3684	5.0434	0.0693	0.0619	0.7804	0.5111	0.0904	0.5697	76.7751	7.3718	5.9702	4.5922	2.1081	0.2715	4.9948	0.2966	7.5084	48.1866	154.088	0.2172	0.9131	0.0824	1.8027	0.5893	1.0145	0.5768	40.6254	8.0777	4.8017	0.637	6.1697	1.8406	0.645	0.2798	0.3357	0.2364	1.1375	0.0037	0.037	0.0972	0.0653
905	1.1897	0.7573	3.1696	0.0252	0.1639	0.2008	0.1245	0.055	1.7514	4.6469	0.059	0.0568	0.844	0.5293	0.0668	0.4206	58.5585	5.317	6.1305	4.2168	1.7667	0.297	4.5167	0.2555	9.1683	67.417	135.464	0.1876	0.7835	0.1246	1.8377	0.7774	1.0532	1.5754	37.3851	9.157	4.6658	0.7094	15.1766	1.8435	0.7583	0.238	0.54	0.1895	1.5309	0.0059	0.0818	0.1013	0.0782
906	1.8243	1.1235	3.0901	0.0328	1.7201	0.1689	0.1613	0.331	1.2132	5.443	0.0548	0.0602	0.693	0.5975	0.1063	0.6615	58.5968	6.3999	6.4039	4.464	2.0784	0.2558	9.7263	0.2731	7.085	67.3747	245.227	0.1872	1.3486	0.0164	1.8074	1.5146	1.1492	2.7943	35.6015	10.0349	4.7812	0.8294	16.385	1.9138	1.1877	0.3049	0.623	0.2545	1.2275	0.0061	0.5537	0.0815	0.09
908	1.2181	1.0286	2.4843	0.0518	0.4645	0.15	0.1428	0.0007	1.6649	4.1283	0.1691	0.0534	1.1034	0.3613	0.1086	0.715	82.9203	4.9461	7.5375	5.5782	2.1576	0.241	7.8074	0.3285	11.7175	63.5381	62.7553	0.245	1.5119	0.1675	2.0096	0.7611	0.9422	0.4112	48.4958	11.3532	6.7559	0.8516	16.6224	2.9925	0.9787	0.2057	0.3456	0.2106	1.0631	0.0063	0.1668	0.0619	0.0798
909	0.6691	1.3479	1.405	0.0502	0.1412	0.1313	0.1099	0.1404	1.8372	6.2702	0.0939	0.0514	0.4268	0.5944	0.0732	0.6029	132.168	9.2813	5.7579	3.7932	2.541	0.2883	6.328	0.2949	5.4532	38.2797	36.674	0.1461	0.6155	0.0736	2.1701	0.4032	1.1423	0.1035	26.9665	6.2629	4.1327	0.5516	17.131	2.1403	0.5226	0.1921	0.2477	0.2651	0.5061	0.0092	0.0474	0.0519	0.0656
[truncated: 35 more columns]

## Sheet: Supply_Table 9
Supplemental Table 9. The clinical information of Cross-sectional samples
ID	Age	Race	Sex	ARM	0to6Intrv	6to12Intrv	WghtKg_0	Hghtcm_0	BMI_0		Vairable Descriptions
9274GODKA	51.3233	1	2	None	None	None	56.4	168	19.983		SEX	1 = male, 2 = female
9167WILJA	47.663	0	1	None	None	None	60	172.9	20.0706		RACE	0 = Caucasian, 1 = AA
9260STINA	53.3041	1	2	None	None	None	55.4	165.6	20.2018		ARM	treat assingment: immediate = diet + exercise (DietE), delayed = diet only first 6 mo (Diet)
9095SEYTR	47.589	0	1	None	None	None	57.8	169.05	20.2254		0 to 6 mo Intervention	Randomized to DietE or Diet
9224RUSMO	50.411	0	2	None	None	None	57	167.5	20.3163		6 to 12 mo Intervention	All receive DietE
9235HALMA	49.1973	0	2	None	None	None	51.4	159	20.3315
9011DANLY	48.5452	1	2	None	None	None	48.2	153.65	20.4165
9215HSIER	45.2027	0	1	None	None	None	66.4	180.05	20.4824
9020WADRE	34.7315	1	2	None	None	None	54.2	162	20.6523
9269KHLPO	36	0	2	None	None	None	51.4	156.7	20.9327
9267YANNA	36.7123	1	2	None	None	None	56.2	163.8	20.9464
9199TREAN	35.6767	1	2	None	None	None	51.2	155.9	21.0658
9041JOHMI	42.6411	0	2	None	None	None	53.4	158.6	21.2293
9016LESRE	47.8192	1	2	None	None	None	62.4	171.4	21.2404
9258OLATR	35.6164	1	2	None	None	None	71.8	183.2	21.3931
9277MARLA	32.2192	1	2	None	None	None	63.6	172.4	21.3985
9236GOLCA	38.0301	1	2	None	None	None	56.8	162.65	21.4704
9111JACJA	47.2603	0	1	None	None	None	72.6	183.7	21.5139
9239LANJE	52.1671	1	2	None	None	None	54.4	158.8	21.5724
9203MALMA	47.3178	1	2	None	None	None	66.4	174.15	21.8938
9213KERRA	50.326	1	2	None	None	None	49.4	149.85	21.9995
9107YOUBE	42.274	0	1	None	None	None	63.6	169.75	22.0718
9261HANKA	43.4767	1	2	None	None	None	61.2	165.75	22.2764
9172DOLPA	48.9233	1	1	None	None	None	68.8	174.55	22.5813
9266ODDKE	47.7589	1	2	None	None	None	58.2	160.45	22.607
9234URAKE	38.7808	1	2	None	None	None	66.2	170.55	22.7591
9050GODTA	33.5918	0	2	None	None	None	63	166.2	22.8075
9069BILHO	33.3808	1	2	None	None	None	62.8	165.65	22.8864
9149ROBEM	30.9233	1	2	None	None	None	77.4	183.5	22.9863
9272GARJE	31.4137	1	2	None	None	None	58.4	159	23.1004
9182KLEDE	52.2603	1	2	None	None	None	59.2	159.65	23.2265
9241CATGI	51.0137	1	2	None	None	None	57.4	157.05	23.2721
9204GILST	53.4137	1	1	None	None	None	80	185.4	23.274
9271ELYJE	38.2959	1	2	None	None	None	61.8	162.7	23.346
9248ARNJU	39.2932	1	2	None	None	None	71.6	175	23.3796
9080WATKA	54.2438	1	2	None	None	None	59.4	159.1	23.4664
9042HUNAA	46.8877	0	1	None	None	None	82.2	186.55	23.6201
9046KINKE	36.8575	0	2	None	None	None	62.8	162.95	23.6511
9194MCGFL	34.2959	0	2	None	None	None	69	169.25	24.0875
9031PALME	43.9562	0	1	None	None	None	69.2	169.45	24.1003
9275NATRO	53.9205	1	2	None	None	None	62.8	161.4	24.1075
9122MARCO	50.0904	0	2	None	None	None	70.6	171	24.1442
9153SHORO	46.5397	1	2	None	None	None	67.2	166.5	24.2405
9134CARAN	33.7945	1	2	None	None	None	60.4	157.45	24.3642
9186JONTO	42.0575	0	2	None	None	None	69.8	168.9	24.4679
9214IRVAL	47.5945	1	1	None	None	None	78.2	178.6	24.5157
9109DORME	43.5068	1	2	None	None	None	66	163.95	24.5539
9230SEAKI	47.3233	0	2	None	None	None	59.2	155.05	24.6251
9193BEGMI	52.5808	1	2	None	None	None	71.6	170.4	24.6589
9070GRARO	49.2822	0	1	None	None	None	82.4	181.6	24.9859
9253BRUST	45.3671	1	2	None	None	None	71.2	168.8	24.9882
9262KELER	42.5479	1	2	None	None	None	73.6	171.5	25.0236
9247MCNAM	48.2356	1	2	None	None	None	63.8	159.6	25.047
9014FENWI	46.1836	1	1	None	None	None	73.2	170.95	25.048
9276CONAN	38.6438	1	2	None	None	None	69.8	166.9	25.0578
9228KIRDE	52.7205	0	2	None	None	None	69.6	166.65	25.061
9243LAMKA	46.7589	1	2	None	None	None	67.8	164.2	25.1468
9126BOTRE	44.2658	0	2	None	None	None	74.6	172.15	25.1724
9098STACH	37.6822	1	1	None	None	None	69.4	165.9	25.2154
9023MCARE	40.7808	1	2	None	None	None	74.6	171.95	25.231
9240SHUJO	51.0301	1	2	None	None	None	59.2	152.65	25.4055
9033FOWWI	50.5425	1	1	None	None	None	77.6	174.45	25.4988
9165THELY	35.5068	0	2	None	None	None	73.2	169.1	25.5991
9174JONKA	38.5205	1	2	None	None	None	78.8	175.3	25.6426
9206HERDE	49.0301	0	2	None	None	None	71.8	167.15	25.6987
9217YOUTO	46.7068	0	2	None	None	None	73	168.45	25.7265
9072WALMA	37.6247	0	1	None	None	None	75.6	170.7	25.9451
9148ARDAN	47.0603	1	2	None	None	None	65.2	158.4	25.9859
9086WRITI	45.1452	0	2	None	None	None	75.2	170.05	26.0055
9256BENJA	53.1151	1	2	None	None	None	73.8	167.5	26.3043
9036CARRO	45.6	0	2	None	None	None	73.8	167.15	26.4146
9208GAGCA	51.1699	1	2	None	None	None	67	159.1	26.4688
9187HAGJA	32.3726	1	2	None	None	None	72.2	164.85	26.568
9176WASJO	47.2466	1	2	None	None	None	73.4	166.2	26.5726
9034MANTH	41.1726	1	1	None	None	None	88	181.9	26.5961
9012STACH	46.3096	1	2	None	None	None	69.6	161.65	26.6353
9043DAVRO	49.1288	0	1	None	None	None	69	160.4	26.8189
9117ROBRO	51.9753	0	1	None	None	None	95.4	188.6	26.8204
9030MCCDO	35.6274	1	2	None	None	None	79.4	171.4	27.0271
9190BILKA	34.6493	1	1	None	None	None	81.8	173.7	27.1115
9195GRECH	42.0384	0	2	None	None	None	72.4	163.4	27.1166
9191LARCI	54.9014	1	2	None	None	None	70	160.3	27.2415
9008TORSA	49.5041	1	2	None	None	None	72	162.55	27.2495
9178WELBR	44.4959	1	1	None	None	None	88.8	180.5	27.2558
9197GOOVA	43.6822	0	2	None	None	None	72.4	162.9	27.2833
9200HORYO	54.0219	0	2	None	None	None	80.2	171.25	27.3472
9006DONMI	48.8055	1	2	None	None	None	82.2	173.3	27.37
9005CLODA	47.1096	1	1	None	None	None	92.4	183.6	27.4111
9179ABDWA	49.3014	0	2	None	None	None	79.2	169.9	27.4371
9232QUIGI	52.2658	0	2	None	None	None	81	171.75	27.4594
9124MASMI	31.0959	0	2	None	None	None	69.6	159	27.5306
9018HANLI	54.3507	1	2	None	None	None	87.8	178.55	27.5407
9028GUEMA	54.211	1	2	None	None	None	64.2	152.45	27.6236
9212MILLA	50.5123	1	2	None	None	None	74	163.55	27.665
9084SLEAL	44.9507	0	1	None	None	None	91.4	181.05	27.8836
9017SLYCA	49.3945	0	2	None	None	None	74.6	163.45	27.9234
9151CALRE	51.8932	0	2	None	None	None	78.4	167.3	28.0107
9037CARLE	51.0247	0	1	None	None	None	81.6	170.5	28.0699
9057COLJA	42.5671	1	1	None	None	None	91.4	180.4	28.0849
9073SENMA	45.7041	0	2	None	None	None	79.6	168	28.2029
9141MANRU	30.7808	1	1	None	None	None	93.2	181.5	28.2919
9164STELE	45.6466	1	2	None	None	None	75.6	163.3	28.3498
9021GLARI	52.9945	1	1	None	None	None	86.6	174.55	28.4235
9137POLLO	52.3808	1	2	None	None	None	69.6	156.2	28.5264
9220MCCRO	55.1479	0	1	None	None	None	88.8	176.3	28.5699
9127PAKI	39.6356	0	2	None	None	None	76.4	163.2	28.6849
9004COYTE	47.6164	1	1	None	None	None	96.2	182.9	28.7573
9116PALCA	47.3753	0	2	None	None	None	74.8	161.15	28.8032
9064CARLA	33.4027	0	2	None	None	None	83.4	170	28.8581
9015FRIRA	40.1863	0	2	None	None	None	80.6	167.05	28.883
9133DUNSU	45.1589	1	2	None	None	None	78.8	165	28.944
9058CRARO	54.2986	0	2	None	None	None	88	174	29.0659
9083WOLAN	55.4548	1	2	None	None	None	84.6	169.6	29.4116
9071ETHDA	48.9616	0	1	None	None	None	90.4	175.2	29.451
9035COVSH	46.0822	0	2	None	None	None	84.8	169.6	29.4811
9082RUSCO	48.2959	0	1	None	None	None	103	186.9	29.4862
9144WILRH	52.9288	0	2	None	None	None	83	167.75	29.4953
9130SCHSA	31.6685	1	2	None	None	None	70	153.8	29.5928
9066GRIJA	44.7918	0	2	None	None	None	76.2	160.4	29.6174
9048TESMA	44.6384	1	2	None	None	None	83.2	167.45	29.6724
9225JACEU	52.2301	0	2	None	None	None	77.4	161.45	29.6937
9219HNATR	39.8247	1	2	None	None	None	79.6	163.55	29.7586
9198CRORE	44.1863	0	2	None	None	None	74.6	158.05	29.8641
9097VINDA	35.9123	1	1	None	None	None	89.2	172.5	29.9769
9196CLAJO	55.0548	0	1	None	None	None	103.6	185.85	29.994
9027GREEA	48.011	0	2	None	None	None	96.8	179.6	30.0098
9161GARKI	48.6247	1	2	None	None	None	74	156.85	30.079
9026KRODE	49.5479	1	2	None	None	None	75.2	157.9	30.1615
9265WINDE	43.9726	1	2	None	None	None	83.2	165.95	30.2113
9218PUPMA	39.674	1	2	None	None	None	88.8	171.2	30.2974
9268BALSA	50.6822	1	2	None	None	None	83.6	165.7	30.4482
9175LAWDO	50.8521	1	2	None	None	None	90.2	172.1	30.454
9278MISCE	46.5534	1	2	None	None	None	77.8	159.2	30.6968
9104HERBO	52.9452	0	2	None	None	None	88	168.9	30.8477
9147CANJE	37.5562	0	2	None	None	None	78.8	159.35	31.0329
9259URSDA	40.6274	1	2	None	None	None	86.4	166.8	31.0543
9279FUNDI	44.7041	1	2	None	None	None	80.4	160.9	31.0559
9044MASRA	48.1178	0	1	None	None	None	104	182.95	31.072
9003BARAR	38.2356	1	1	None	None	None	91.8	171.55	31.1933
9227SIRMI	44.7699	0	2	None	None	None	77.4	157.45	31.2216
9202LINJA	46.9671	0	2	None	None	None	87.4	167.1	31.301
9001RENMA	40.3068	1	2	None	None	None	71.6	150.85	31.4646
9281PERVA	54.9096	0	2	None	None	None	99.4	177.55	31.5315
9210SIEJE	45.7096	1	2	None	None	None	83.8	162.95	31.5599
9131BOWDA	48.2603	0	1	None	None	None	103.2	180.5	31.6756
9024MILST	44.8548	1	2	None	None	None	85.8	164.4	31.7456
9094RUSDI	35.6164	0	2	None	None	None	85.2	163.55	31.8521
9079PARRO	53.063	0	1	None	None	None	94.6	171.9	32.014
9061HOWCH	50.0959	0	1	None	None	None	111.4	186.45	32.045
9257OMAMI	52.8904	1	2	None	None	None	92.4	169.6	32.1233
9128BRECL	41.6247	0	1	None	None	None	104.6	180.4	32.1409
9019VARRI	47.6685	1	2	None	None	None	89.8	167.1	32.1605
9110RUSJU	54.3288	1	2	None	None	None	77.6	155	32.2997
9285CROLU	55.2658	1	2	None	None	None	87.6	164.5	32.3722
9209DAVME	41.789	0	2	None	None	None	86.2	163.1	32.4041
9054MATMA	46.2904	0	2	None	None	None	89.2	165.65	32.5074
9049CORAN	41.611	1	1	None	None	None	102	176.85	32.6129
9022HOSLI	51.5836	1	2	None	None	None	87.6	163.8	32.6495
9120PRATO	41.4411	0	2	None	None	None	98	172.8	32.82
9145FRADE	32.0658	0	2	None	None	None	89.8	165.2	32.9046
9284RAWDI	33.3726	0	2	None	None	None	95.2	170.05	32.9218
9132EDWDA	38.526	1	1	None	None	None	103.6	177.35	32.938
9074TURTA	33.0137	0	2	None	None	None	88	163.45	32.9392
9255KONHE	47.6192	1	2	None	None	None	84.4	160	32.9687
9263ELIBE	36.6822	1	2	None	None	None	82	157.25	33.1614
9136CZIDA	33.7479	1	2	None	None	None	90	164.7	33.1784
9039INGMA	44.9507	0	1	None	None	None	115.4	186.05	33.3385
9025KINWA	37.3589	0	1	None	None	None	95.4	168.45	33.6207
9280DANBA	42.4247	0	2	None	None	None	86.8	160.65	33.6324
9223ALLDA	51.5589	0	2	None	None	None	104.2	176	33.6389
9211ROWJA	49.6849	1	2	None	None	None	96.6	169.3	33.7026
9201BARJO	51.926	1	1	None	None	None	91.6	164.6	33.8093
9242TAYDE	55.9397	0	2	None	None	None	99.4	171.45	33.8152
9177KEYBA	51.2575	1	2	None	None	None	97	169.05	33.9423
9060ROBDA	50.7781	0	1	None	None	None	106.6	177.05	34.0068
9282MEJLA	48.5397	1	2	None	None	None	81.6	154.9	34.0085
9010MCNJO	44.8575	1	1	None	None	None	106.4	176.65	34.0969
9283LUTFR	53.5973	1	2	None	None	None	81.2	153.45	34.4844
9087ROLDA	48.4027	1	1	None	None	None	103.8	172.5	34.8834
9154WIEJA	33.6164	1	1	None	None	None	124.8	189	34.9374
1001BOYSH	48.9096	1	2	Immediate	DietE	DietE	94.4	164.1	35
3014GLOCA	45.1753	0	2	Immediate	DietE	DietE	90.6	161.1	35
1003BENKA	42.3041	1	2	Delayed	Diet	DietE	100	168.65	35.3
1039KLOJO	36.4274	1	2	Immediate	DietE	DietE	89.8	159.35	35.3
1017HAFBE	54.4027	1	2	Delayed	Diet	DietE	97.2	165.45	35.5
1148GOOSU	37.8082	1	2	Delayed	Diet	DietE	93.6	160.25	36.4
1009MCALI	43.3562	1	2	Immediate	DietE	DietE	98.8	164	36.7
1047LORJO	37.074	1	1	Delayed	Diet	DietE	106.9	170.85	36.7
1019MANLE	54.5233	1	2	Immediate	DietE	DietE	96.6	162	36.8
1008PEGDA	40.6658	1	2	Delayed	Diet	DietE	110.4	172.85	37.1
1006REIFA	47.6575	1	2	Delayed	Diet	DietE	105	168.2	37.2
3030SMIZE	43.6767	0	2	Delayed	Diet	DietE	101	164.85	37.2
1126SPAAN	45.9425	1	2	Delayed	Diet	DietE	97	161.2	37.3
1144SIMKA	50.8822	0	2	Delayed	Diet	DietE	107	169.1	37.5
1180BUCSH	47.2274	0	2	Immediate	DietE	DietE	99	162.3	37.5
1140GORDE	53.6	0	2	Immediate	DietE	DietE	93.6	157	37.9
1161THOWA	52.6658	1	1	Immediate	DietE	DietE	134.2	188	38
3037LEWWI	37.2795	0	1	Immediate	DietE	DietE	120.8	178.45	38
1157ELLLA	41.6219	0	2	Immediate	DietE	DietE	102	163.3	38.2
3024HUNIO	52.1671	0	2	Delayed	Diet	DietE	96	158.55	38.2
1004JOHSE	48.1753	0	2	Delayed	Diet	DietE	102.8	163.85	38.3
1028SMYAU	46.4877	0	2	Immediate	DietE	DietE	94	156.75	38.3
1049ALTAN	35.9315	1	1	Immediate	DietE	DietE	108.7	168.45	38.3
3001MASCA	37.3534	0	2	Delayed	Diet	DietE	112.6	171.5	38.3
1024BROTO	55.2027	1	2	Immediate	DietE	DietE	101	162.05	38.4
1143GODRO	49.4192	1	2	Immediate	DietE	DietE	103.4	163.7	38.6
1059QUIDO	45.9452	1	2	Delayed	Diet	DietE	100.4	161.25	38.7
1026JACAN	50.8959	1	2	Delayed	Diet	DietE	114.6	171.65	38.9
1062NOREA	44.674	0	2	Immediate	DietE	DietE	105.4	164.05	39.2
3036BURDE	50.5342	1	2	Immediate	DietE	DietE	102	161.308	39.2
3032QUIBA	53.3644	0	2	Delayed	Diet	DietE	98.8	158	39.5
1010PLABA	53.9699	1	2	Immediate	DietE	DietE	108	164.4	39.9
1007RAMDE	48.1808	1	2	Immediate	DietE	DietE	118.4	171.7	40.1
1037VOGPA	45.8685	1	2	Delayed	Diet	DietE	118.8	172.15	40.1
1044PATLI	46.8932	1	2	Immediate	DietE	DietE	108.5	164.55	40.1
1149MONJE	47.7041	1	1	Delayed	Diet	DietE	120.4	173.1	40.1
3026LATSH	33.6356	0	2	Immediate	DietE	DietE	108	164.25	40.1
1011JOHCH	54.5151	1	2	Delayed	Diet	DietE	105.6	161.95	40.2
1146KELBA	41.737	1	2	Immediate	DietE	DietE	107.4	163.6	40.2
1058HACKA	52.0575	1	2	Immediate	DietE	DietE	93.6	152.4	40.3
1061CLOEL	47.1781	1	2	Delayed	Diet	DietE	118.2	171.15	40.3
1020SCRVI	50.3479	0	2	Delayed	Diet	DietE	115.6	168.9	40.5
3004CASJA	53.6466	0	2	Delayed	Diet	DietE	123.4	174.45	40.5
1168WATTE	55.537	0	1	Delayed	Diet	DietE	130	179	40.6
1014BIDJO	38.0658	1	2	Delayed	Diet	DietE	102.2	158.5	40.7
1051BOLLI	41.0027	1	2	Immediate	DietE	DietE	106.6	161.5	40.9
1013PALJO	35.6027	0	2	Immediate	DietE	DietE	115	167	41.2
1154DIGKI	46.7863	0	2	Immediate	DietE	DietE	123.8	173.45	41.2
1165BUTEI	41.8192	1	2	Delayed	Diet	DietE	97.6	154.3	41.2
1032CARRH	46.7123	0	2	Delayed	Diet	DietE	111	164.1	41.3
1128VANJU	38.3918	1	2	Delayed	Diet	DietE	111	163.65	41.5
1162ROBAD	43.874	0	2	Immediate	DietE	DietE	113.2	165.1	41.5
1164POLED	51.9973	1	1	Immediate	DietE	DietE	130.6	176.45	41.8
1178FRACO	42.011	0	2	Immediate	DietE	DietE	112.8	163.85	41.9
3025WADKI	45.4795	0	2	Immediate	DietE	DietE	122.2	170.7	41.9
1022GOGAN	40.5342	0	2	Delayed	Diet	DietE	130.2	175.8	42.1
1056GHERI	49.3836	1	1	Delayed	Diet	DietE	137.3	180.6	42.1
1181WATBE	53.7397	1	2	Delayed	Diet	DietE	101	154.4	42.3
1016LISCE	55.0603	1	2	Delayed	Diet	DietE	109.1	160.4	42.4
1041GRUJA	40.3945	1	2	Delayed	Diet	DietE	121.6	168.85	42.6
1121MILJO	54.7753	1	2	Delayed	Diet	DietE	108.8	159.6	42.7
1054BECVA	49.4384	1	2	Delayed	Diet	DietE	109.9	160.2	42.8
1012WALRO	47.9178	1	2	Immediate	DietE	DietE	100.8	153.35	42.9
1055MANSU	49.2712	1	2	Delayed	Diet	DietE	94.4	148.4	42.9
1034TITIN	35.0767	0	2	Delayed	Diet	DietE	134.1	176.55	43
1127TALJA	53.6274	1	2	Immediate	DietE	DietE	121.4	168.05	43
3003ROBTE	53.2356	0	2	Delayed	Diet	DietE	137.2	178.4	43.1
1045GERAN	54.9425	1	2	Delayed	Diet	DietE	104.1	155.2	43.2
3034BESAL	31.4521	0	2	Immediate	DietE	DietE	119.8	166.5	43.2
1065DEMAM	36.5973	1	2	Immediate	DietE	DietE	111.5	160.35	43.4
1035BACKA	47.5808	1	2	Delayed	Diet	DietE	118.8	165.15	43.6
1163CAMMA	55.0055	0	2	Delayed	Diet	DietE	104.8	155	43.6
1057ESTLI	49.5644	1	2	Immediate	DietE	DietE	117.6	163.9	43.7
1130NI.PR	55.0986	0	2	Delayed	Diet	DietE	104.6	154.9	43.7
1053OZAPA	51.7315	1	2	Delayed	Diet	DietE	114.3	161.55	43.8
1015DOBMI	43.5425	1	2	Immediate	DietE	DietE	118.4	164.3	43.9
1155ANTEV	50.611	1	2	Delayed	Diet	DietE	118.4	164.2	43.9
1156THEPA	55.6219	1	2	Immediate	DietE	DietE	112.4	160	43.9
1183LEFGA	46.4575	1	2	Delayed	Diet	DietE	113	160	43.9
1171JONPA	51.8658	1	2	Immediate	DietE	DietE	145.2	181.75	44
1179HEHME	39.0877	1	2	Immediate	DietE	DietE	123.8	167.7	44
1031ILCJO	55.4521	1	1	Immediate	DietE	DietE	141	178.8	44.1
1118FRIVI	53.5123	1	2	Delayed	Diet	DietE	111.6	159.2	44.1
3002WHIKE	51.8849	0	1	Delayed	Diet	DietE	132.4	173	44.2
1036KRAFR	48.6055	1	2	Immediate	DietE	DietE	120.6	164.75	44.5
1050KRIJO	42.7507	1	1	Immediate	DietE	DietE	142.9	179.05	44.5
1120METMI	52.5096	1	2	Immediate	DietE	DietE	126.2	168.05	44.6
1160WILJO	37.5644	0	2	Immediate	DietE	DietE	116.6	161.4	44.7
1018TETKA	55.7507	1	2	Delayed	Diet	DietE	106.6	154.1	44.8
1182STELU	51.5178	1	2	Delayed	Diet	DietE	99.6	149.15	44.9
1142SPAMA	52.0658	1	2	Immediate	DietE	DietE	126.4	167.8	45
1152CERJA	47.5014	1	2	Immediate	DietE	DietE	125.6	166.65	45.3
1040LANKE	36.1397	1	2	Immediate	DietE	DietE	112.1	156.9	45.4
1064MEEJO	50.6466	0	2	Immediate	DietE	DietE	130.3	168.8	45.7
1002GRELO	54.463	1	2	Delayed	Diet	DietE	136.8	172.7	46
1129WIRDE	54.5644	1	2	Immediate	DietE	DietE	128.6	166.8	46.2
3027DEVRO	44.4521	0	2	Delayed	Diet	DietE	116.2	158.5	46.3
1042WARJI	36.1616	1	2	Immediate	DietE	DietE	146.2	176.6	46.8
3040CAMAL	49.7315	0	2	Immediate	DietE	DietE	125.2	163.55	46.8
1033MILBE	55.537	1	2	Immediate	DietE	DietE	132.5	167.8	47.1
1025MIKLO	52.5863	1	2	Immediate	DietE	DietE	131.8	166.7	47.5
1063WHACH	37.926	0	2	Immediate	DietE	DietE	136	168.7	47.7
1115CORJO	43.389	1	1	Immediate	DietE	DietE	144.4	173.85	47.7
1038HARSH	39.274	0	2	Immediate	DietE	DietE	127.4	163.15	47.8
1029HOWKA	54.1726	0	2	Immediate	DietE	DietE	130	164.15	48.2
1136KISCH	44.1151	1	2	Immediate	DietE	DietE	123	159.85	48.2
1141KEARI	39.1781	1	1	Immediate	DietE	DietE	160.6	182.7	48.2
1005GOSRI	36.3671	1	2	Immediate	DietE	DietE	136.6	168.1	48.3
3012FRATY	38.2247	0	2	Delayed	Diet	DietE	139.2	169	48.7
1138MARDA	38.0822	1	2	Delayed	Diet	DietE	133.2	164.3	49.2
1147RATDE	50.789	1	2	Delayed	Diet	DietE	126.2	158.95	50
1153MCMEV	48.9781	0	2	Delayed	Diet	DietE	128.6	160.3	50
1060DISSU	47.474	1	2	Immediate	DietE	DietE	116.6	152.6	50.1
1137WANMI	32.8685	1	2	Delayed	Diet	DietE	132.2	162.4	50.2
1134RENSH	51.726	1	2	Delayed	Diet	DietE	131.6	161.35	50.6
1023WATLY	42.9671	1	2	Delayed	Diet	DietE	121.2	154.6	50.7
1125SMICA	53.737	1	2	Immediate	DietE	DietE	129.4	159.45	50.9
1139WALCU	49.3863	0	2	Immediate	DietE	DietE	140.2	165.9	51
1184PLAEL	49.411	1	2	Immediate	DietE	DietE	116	150.52	51.2
3020SAUJA	50.411	0	2	Delayed	Diet	DietE	130	158.75	51.7
3009RILGL	41.2932	0	2	Immediate	DietE	DietE	154.4	172.7	51.9
1027COORE	46.189	1	2	Delayed	Diet	DietE	156.8	172.6	52.6
1052THOLA	41.3836	0	2	Delayed	Diet	DietE	152.6	170.35	52.6
1177PALTA	46.1123	0	2	Immediate	DietE	DietE	140	162.65	53
1021FIOLO	46.0822	1	1	Immediate	DietE	DietE	176.2	181.05	53.7
3010PANTY	50.6247	0	1	Immediate	DietE	DietE	167.8	174.45	55.1
3035DAVKI	47.1671	1	2	Delayed	Diet	DietE	152.4	166.159	55.2
1145COCBE	50.4795	1	2	Delayed	Diet	DietE	128	150.85	56.4
1119GREAN	54.4849	0	2	Delayed	Diet	DietE	140.8	154.75	58.6
1048BALJE	38.3616	1	2	Delayed	Diet	DietE	159.3	157.1	64.5

[truncated: 1 more sheets: Supply_Table 10]
